# Supplementary material
Source: publisher figshare collection journal article supplement (https://acs.figshare.com/ndownloader/files/8810398)
Supplement: Supplementary file 1 [file 8810398]

Supporting Information for

**Water-Soluble Phosphaviologens for Effective Photo-Induced Charge Separation**

*Monika Stolar, Belinda Heyne, and Thomas Baumgartner\**

Department of Chemistry & Centre for Advanced Solar Materials, University of Calgary,  
2500 University Drive N.W.  
Calgary, Alberta, Canada, T2N 1N4  
e-mail: [Thomas.baumgartner@ucalgary.ca](mailto:Thomas.baumgartner@ucalgary.ca)

Contents

|                                  |     |
|----------------------------------|-----|
| General Procedures and Equipment | S1  |
| TiO <sub>2</sub> Conditioning    | S2  |
| CV Results                       | S4  |
| UV-vis Results                   | S9  |
| Crystal Structure                | S13 |
| DFT Calculations                 | S15 |
| NMR Data                         | S20 |
| TGA Data                         | S32 |
| LED Lamp Spectra                 | S40 |
| References                       | S41 |

**General Procedures and Equipment.** Reactions were carried out under ambient conditions unless otherwise specified. 4-(Bromomethyl)benzoic acid, methyl 4-(bromomethyl)benzoate, and methyl triflate were purchased from Sigma Aldrich; TiO<sub>2</sub> (anatase, 10 nm, Photocatalyst) was purchased from MKnano division of M K Impex Corp. and used without further purification. N-Methyl-4,4'-bipyridinium iodide,<sup>[S1]</sup> 2,7-diazadibenzophosphole oxide,<sup>[S2]</sup> N-methyl-2,7-diazadibenzophosphole oxide triflate<sup>[S3]</sup> were prepared according to previously reported literature procedures. Microwave synthesis was carried out in a CEM Discover microwave. NMR solvents were purchased from Sigma Aldrich. <sup>31</sup>P{<sup>1</sup>H} NMR, <sup>1</sup>H NMR, <sup>19</sup>F{<sup>1</sup>H} NMR, and <sup>13</sup>C{<sup>1</sup>H} NMR were recorded on Bruker Avance (-II,-III) 400 MHz spectrometers. Chemical shifts were referenced to external 85% H<sub>3</sub>PO<sub>4</sub> (<sup>31</sup>P), C<sub>6</sub>F<sub>6</sub> (<sup>19</sup>F) and external TMS (<sup>1</sup>H, <sup>13</sup>C) or residual non-deuterated solvent peaks (<sup>1</sup>H, <sup>13</sup>C). Mass spectra were run on a Finnigan SSQ 7000 spectrometer or a Bruker Daltonics AutoFlex III system. Elemental analyses were performed in the Department of Chemistry at the University of Calgary. Thermogravimetric Analysis (TGA) was performed on a TA-Instruments Q50 instrument. Cyclic voltammetry analyses were performed on an Autolab PGSTAT302 instrument, with a polished glassy carbon electrode as the working electrode, a Pt-wire as counter electrode, and an Ag wire as reference electrode, using ferrocene/ferrocenium (Fc/Fc<sup>+</sup>) as internal standard. If not otherwise noted, cyclic voltammetry (CV) experiments were performed in acetonitrile solution with tetrabutylammonium hexafluorophosphate (0.1M) as supporting electrolyte. Zeta potentials were measured using a Malvern Zetasizer ZS. UV-vis experiments were carried out in water and methanol/ethanol on a UV-Vis-NIR Cary 5000 spectrophotometer and UV-Vis Cary 50. Crystal data and details of the data collection are provided in Table S2. Irradiation was performed with a 2W LED purchased from Lumex, whose spectral profile can be found in Figure S40. Diffraction data were collected on a Bruker SMART CCD X-ray Diffractometer. CCDC 1526886 contains the supplementary crystallographic data for this paper. These data can be obtained free of charge from The Cambridge Crystallographic Data Centre via [www.ccdc.cam.ac.uk/data\\_request/cif](http://www.ccdc.cam.ac.uk/data_request/cif).

**Conditioning of TiO<sub>2</sub>.** The commercially available TiO<sub>2</sub>(anatase), was dried overnight under vacuum at 120 °C, then purged with N<sub>2</sub> and kept under inert atmosphere until used.

**TiO<sub>2</sub> Functionalization with MVA.** The dried TiO<sub>2</sub> nanoparticles were functionalized using a 1.2 wt% dispersion in a methanol solution containing **MVA** ( $2.6 \times 10^{-2}$  M). The mixture was ultrasonicated for 30 min or 2 hrs at room temperature followed by centrifugation of the dispersion to isolate the functionalized nanoparticles (**TiO<sub>2</sub>MVA**) yielding 4.8% **MVA** loading.

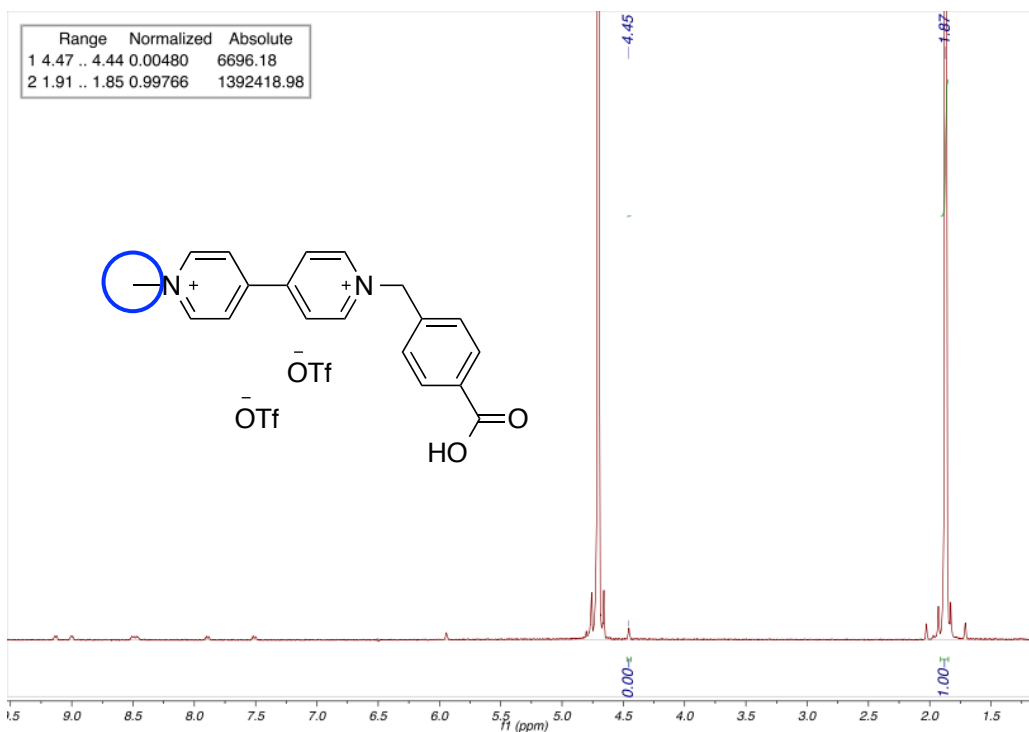

**Figure S1.** <sup>1</sup>H NMR of washed TiO<sub>2</sub>MVA in 0.035 M sodium acetate in D<sub>2</sub>O (circled protons show those used for integration).

Loading Calculation

$$\begin{aligned}
 & 0.035 \text{ mmol (sodium acetate)} \times \frac{0.0048 \text{ (MVA)}}{0.99766 \text{ (sodium acetate)}} \\
 & = 0.00016839 \text{ mmol (MVA)} \\
 & 0.00016839 \text{ mmol} \times 604.49 \frac{\text{g}}{\text{mol}} = 0.10179251 \text{ mg (MVA)} \\
 & \frac{0.10179251 \text{ mg (MVA)}}{2.1 \text{ mg (TiO}_2\text{MVA)}} \times 100 \% = 4.8 \%
 \end{aligned}$$

**TiO<sub>2</sub> Functionalization with PVA.** The dried nanoparticles were functionalized using a 1.3 wt% dispersion in a methanol solution containing **PVA** ( $2.6 \times 10^{-2}$  M). The mixture was ultrasonicated for 30 min or 2 hrs at room temperature followed by centrifugation of the dispersion to isolate the functionalized nanoparticles (**TiO<sub>2</sub>PVA**) yielding 2.9% **PVA** loading.

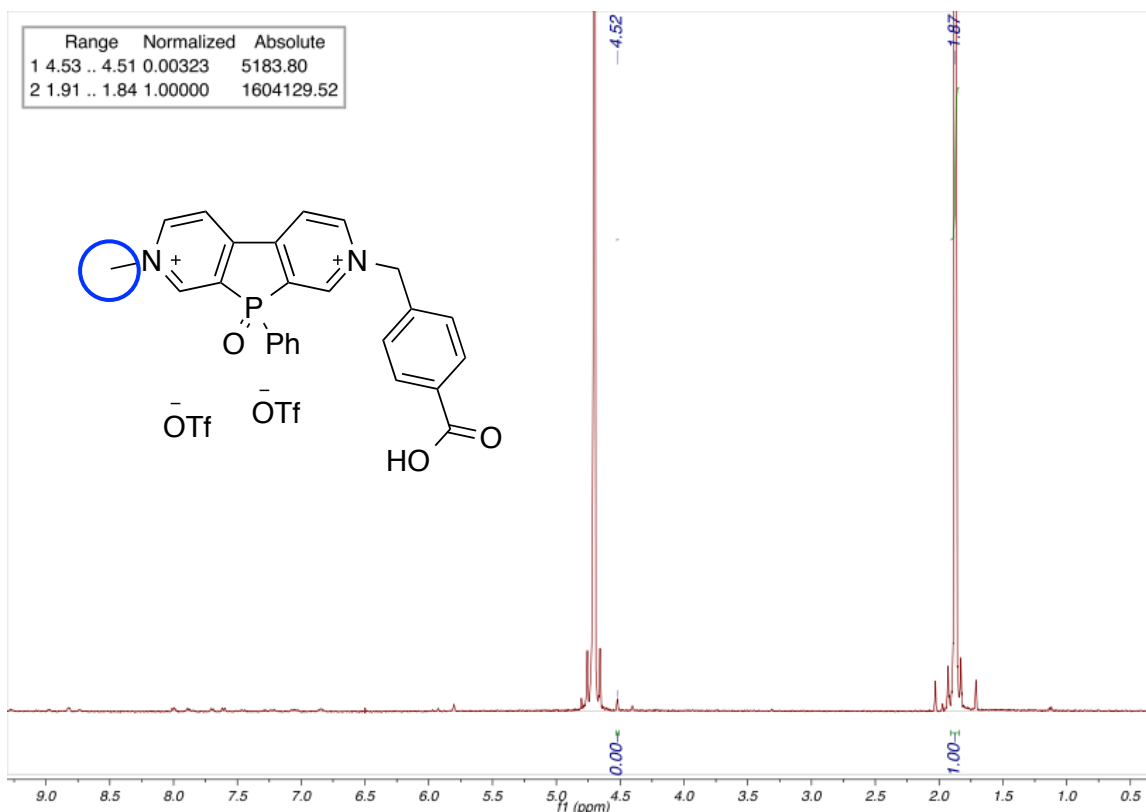

**Figure S2.** <sup>1</sup>H NMR of washed TiO<sub>2</sub>PVA in 0.035 M sodium acetate in D<sub>2</sub>O (circled protons show those used for integration).

Loading Calculation

$$\begin{aligned}
 &0.035 \text{ mmol (sodium acetate)} \times \frac{0.00323 \text{ (PVA)}}{1.00000 \text{ (sodium acetate)}} \\
 &= 0.00011305 \text{ mmol (PVA)} \\
 &0.00011305 \text{ mmol} \times 726.55 \frac{\text{g}}{\text{mol}} = 0.08213648 \text{ mg (PVA)} \\
 &\frac{0.08213648 \text{ mg (PVA)}}{2.8 \text{ mg (TiO}_2\text{PVA)}} \times 100 \% = 2.9 \%
 \end{aligned}$$



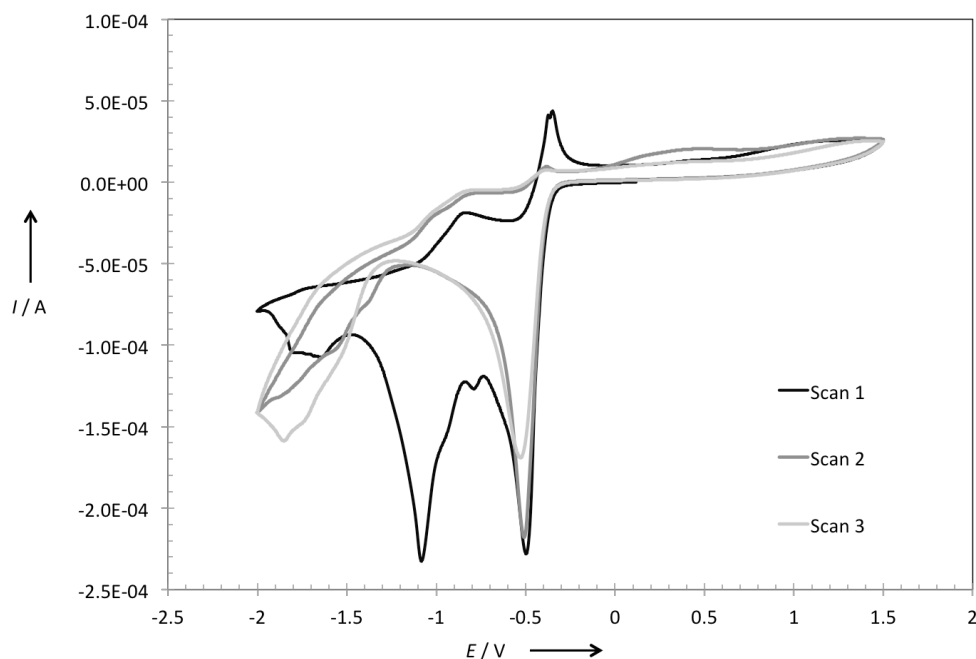

**Figure S3. Electrochemistry of MVA.** Cyclic voltammogram of **MVA** in acetonitrile solution with tetrabutylammonium hexafluorophosphate (0.1M) as supporting electrolyte after multiple scans showing irreversible build up of material on electrode.

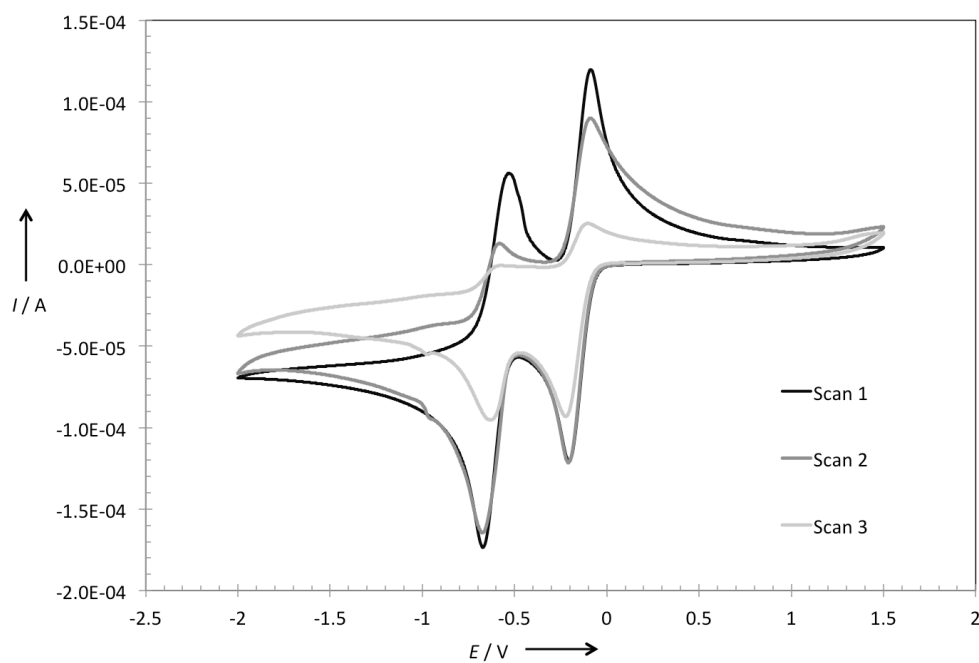

**Figure S4. Electrochemistry of PVA.** Cyclic voltammogram of **PVA** in acetonitrile solution with tetrabutylammonium hexafluorophosphate (0.1M) as supporting electrolyte after multiple scans showing irreversible build up of material on electrode.

**Table S1.** CV data for **MVA** and **PVA** in acetonitrile solution with tetrabutylammonium hexafluorophosphate (0.1M) as supporting electrolyte

| Compound   | E <sub>red1,cathodic peak</sub> | E <sub>red2,cathodic peak</sub> |
|------------|---------------------------------|---------------------------------|
| <b>MVA</b> | -0.49 V                         | -1.08 V                         |
| <b>PVA</b> | -0.20 V                         | -0.67 V                         |

Due to the poor behavior of these species under the specified condition the cathodic peaks are reported without the use of an internal reference and are referenced to an Ag/Ag<sup>+</sup> wire.

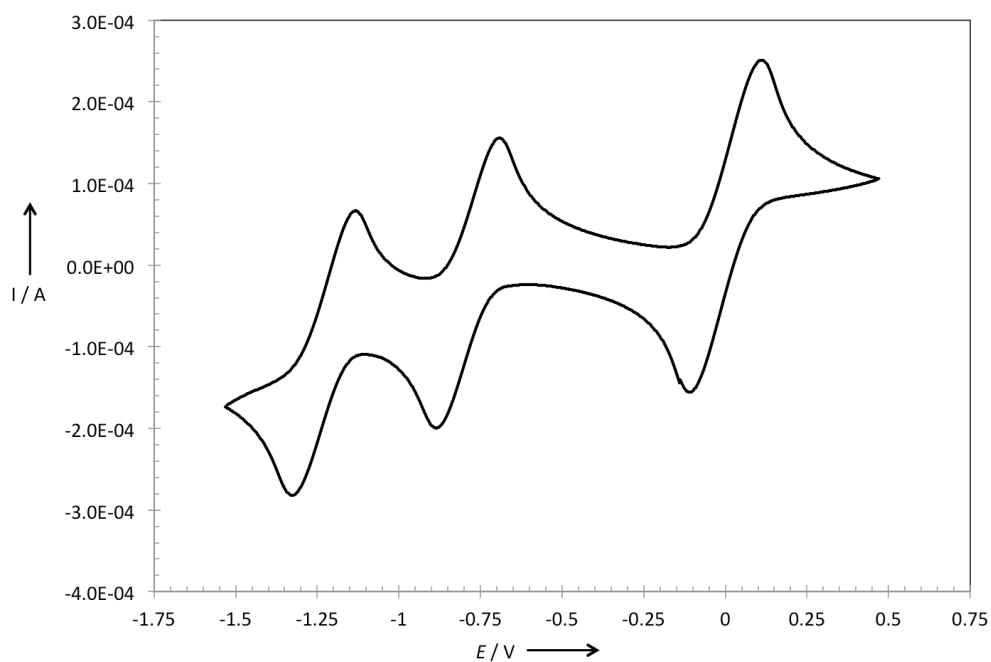

**Figure S5. Electrochemistry of MVE.** Cyclic voltammogram of **MVE** in acetonitrile solution with tetrabutylammonium hexafluorophosphate (0.1M) as supporting electrolyte, potential  $E$  referenced to  $\text{Fc}/\text{Fc}^+$  as an internal standard.

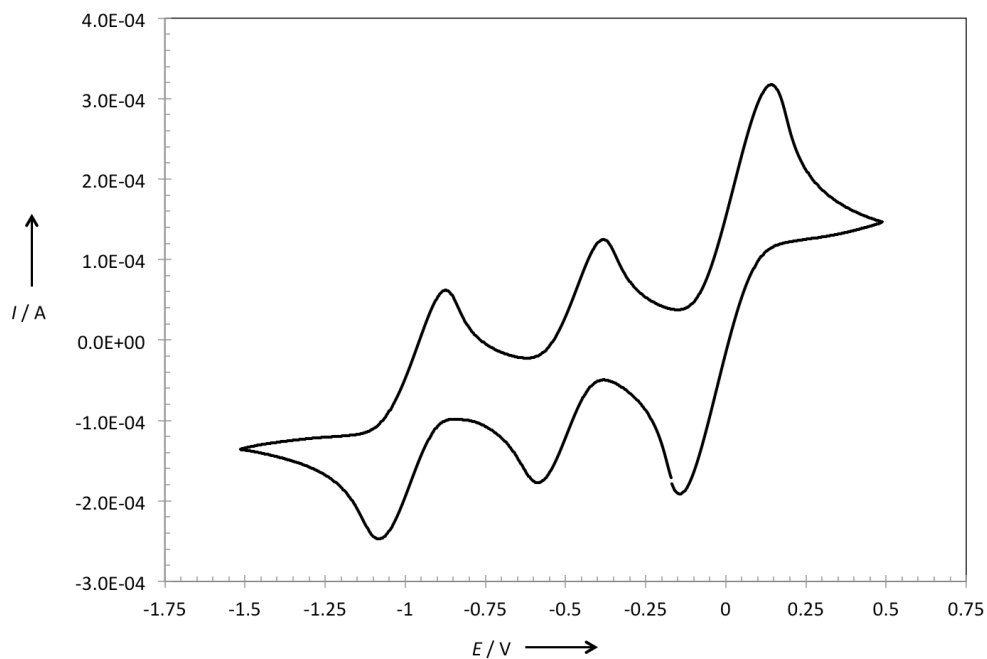

**Figure S6. Electrochemistry of PVE.** Cyclic voltammogram of **PVE** in acetonitrile solution with tetrabutylammonium hexafluorophosphate (0.1M) as supporting electrolyte, potential  $E$  referenced to  $\text{Fc}/\text{Fc}^+$  as an internal standard.

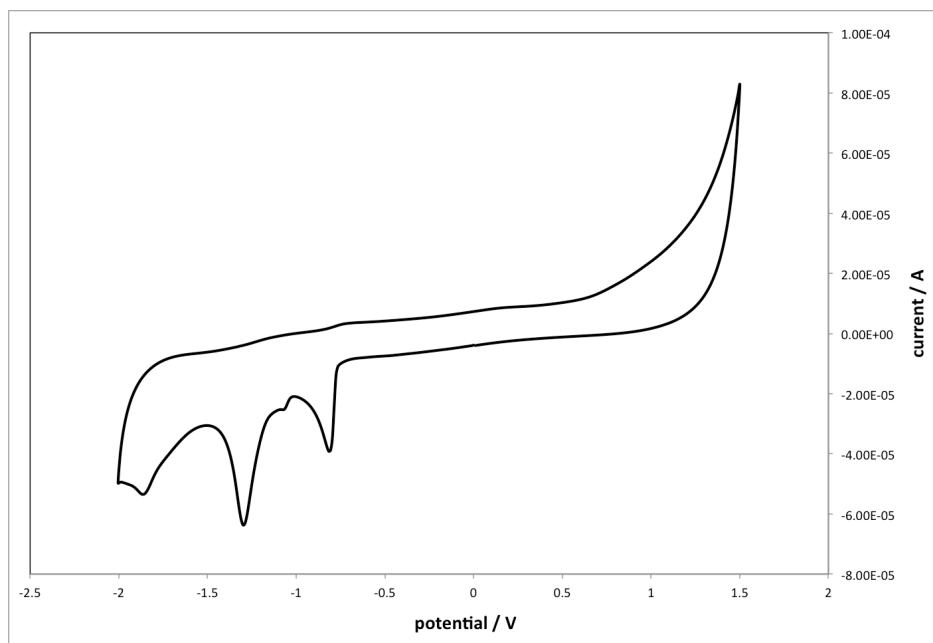

**Figure S7. Electrochemistry of MVA.** Cyclic voltammogram of **MVA** in water with lithium perchlorate (0.1M) as supporting electrolyte.

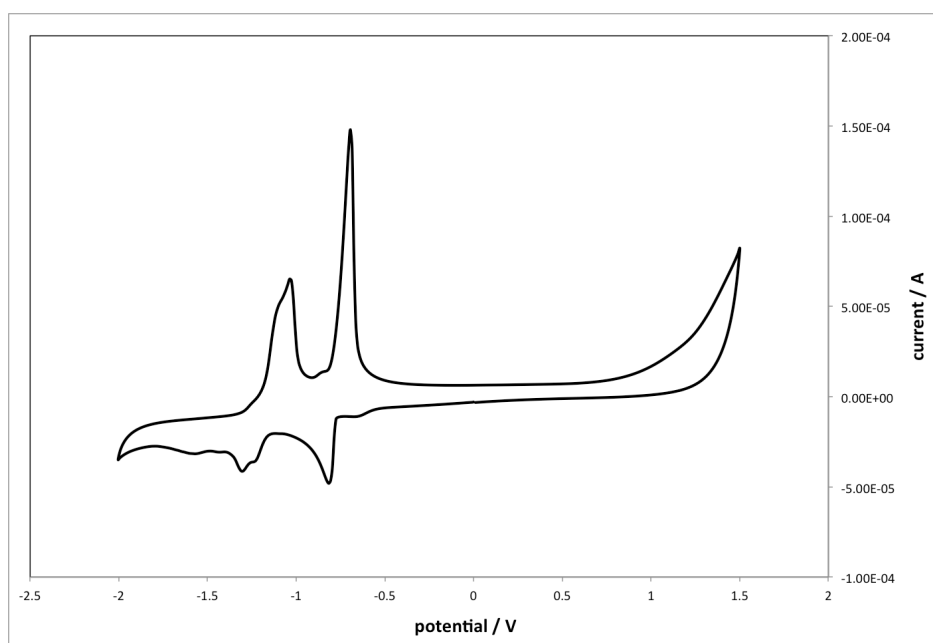

**Figure S8. Electrochemistry of MVE.** Cyclic voltammogram of **MVE** in water with lithium perchlorate (0.1M) as supporting electrolyte.

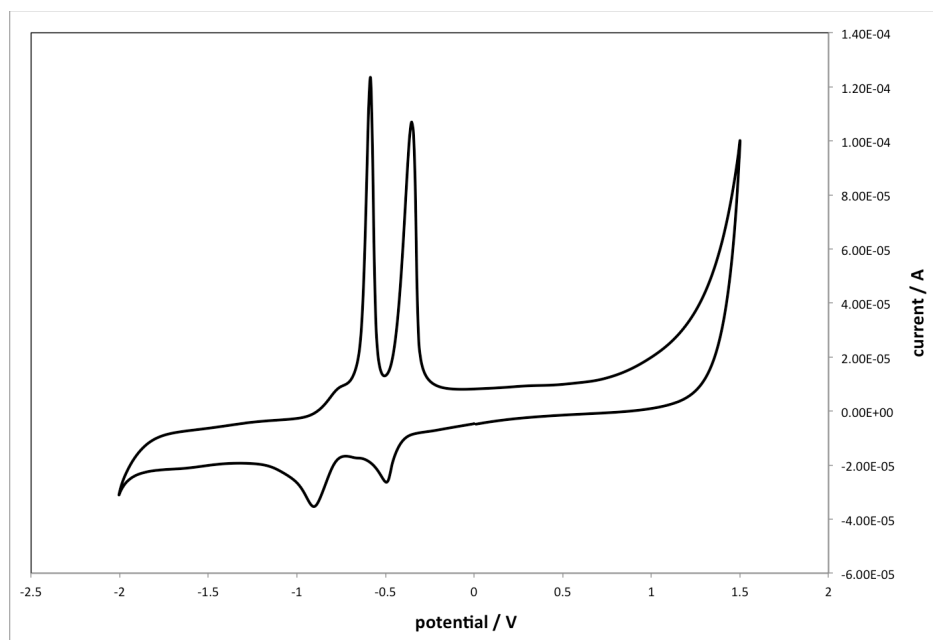

**Figure S9. Electrochemistry of PVA.** Cyclic voltammogram of PVA in water with lithium perchlorate (0.1M) as supporting electrolyte.

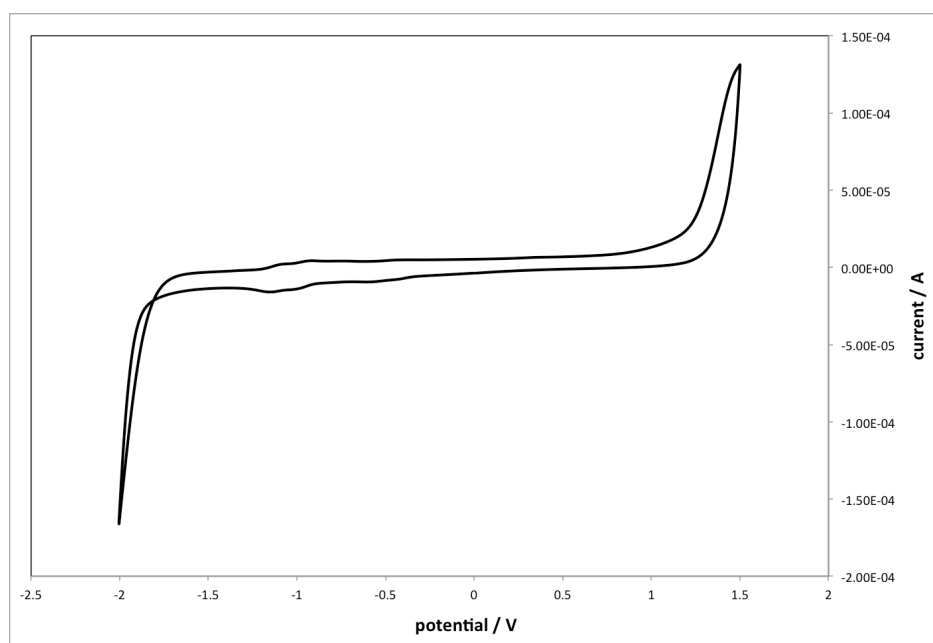

**Figure S10. Electrochemistry of PVE.** Cyclic voltammogram of PVE in water with lithium perchlorate (0.1M) as supporting electrolyte.

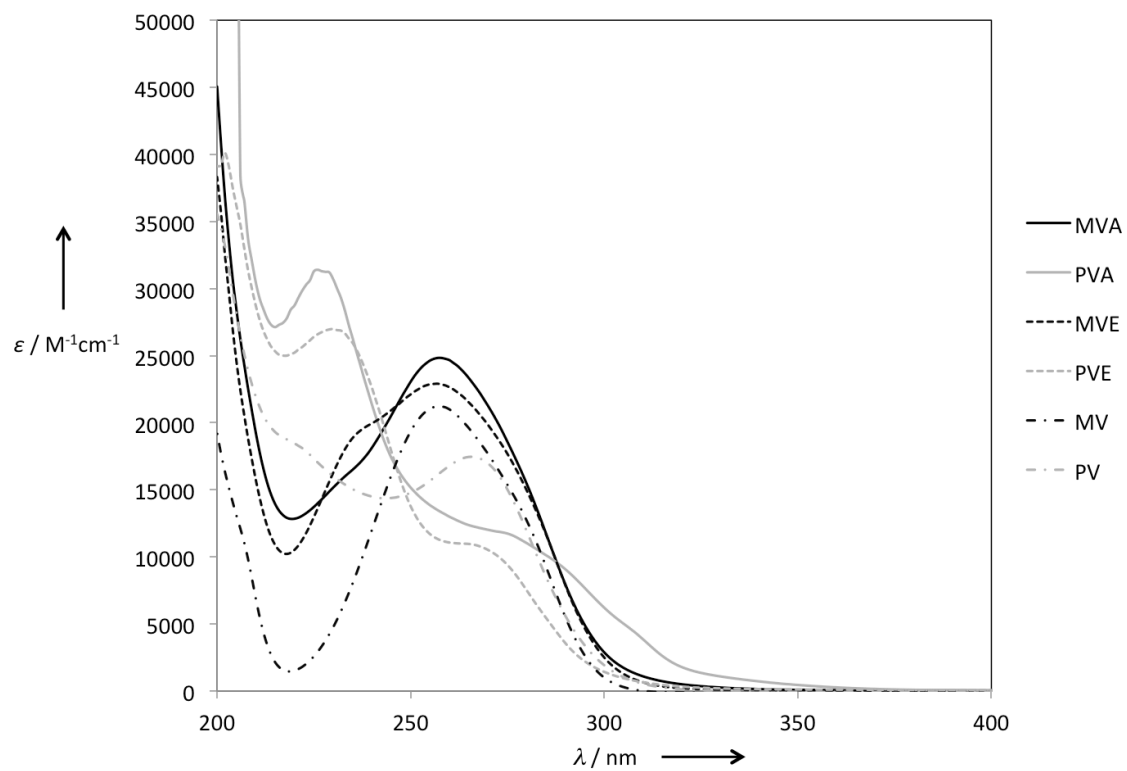

**Figure S11. UV-Vis of diquaternized salts.** UV-Vis spectra of the synthesized dicationic salt species (no features at 400-800 nm) in deionized water.

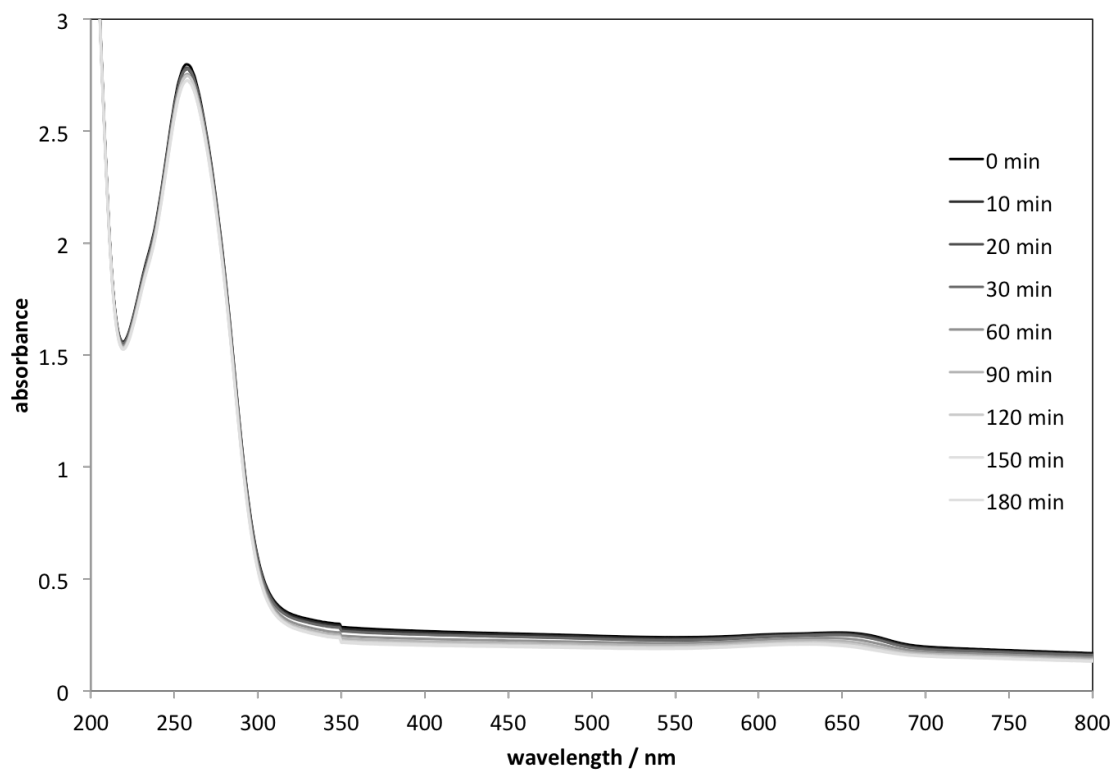

**Figure S12.** Evolution of the absorption spectrum of **MVA** under aerobic irradiation at 406 nm in water in the presence of  $\text{TiO}_2$ .

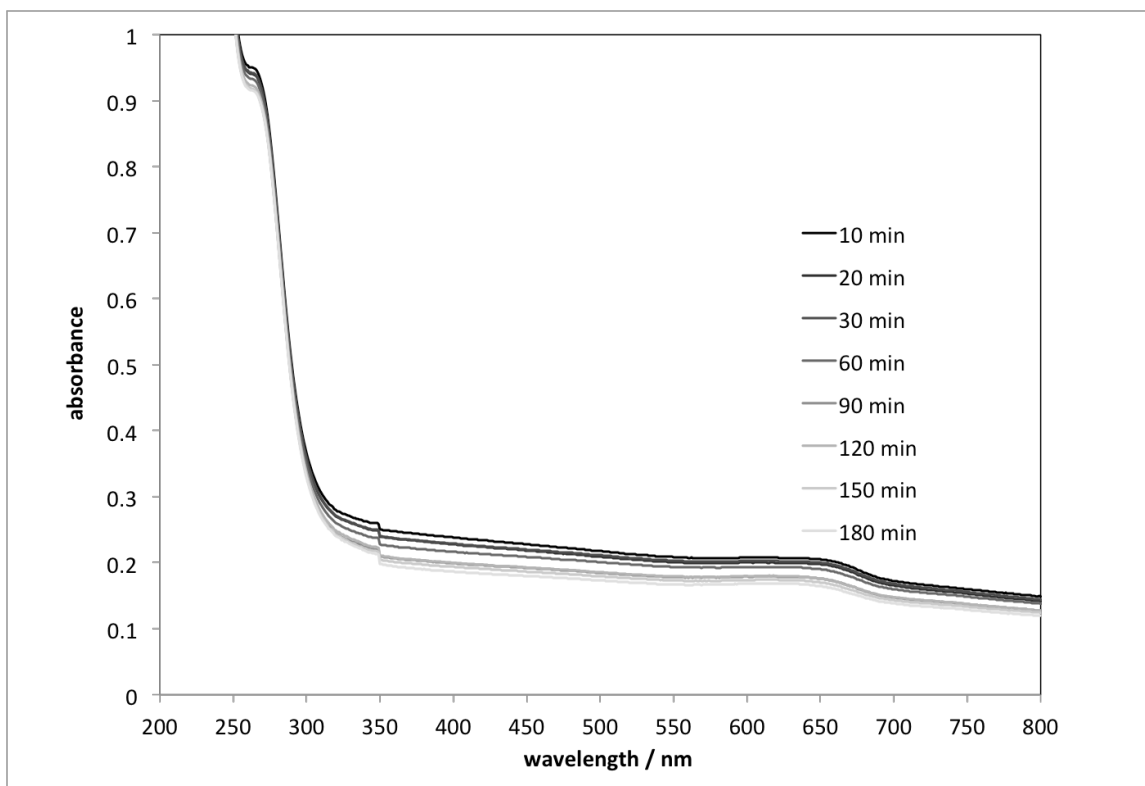

**Figure S13.** Evolution of the absorption spectrum of **PVA** under aerobic irradiation at 406 nm in water in the presence of  $\text{TiO}_2$ .



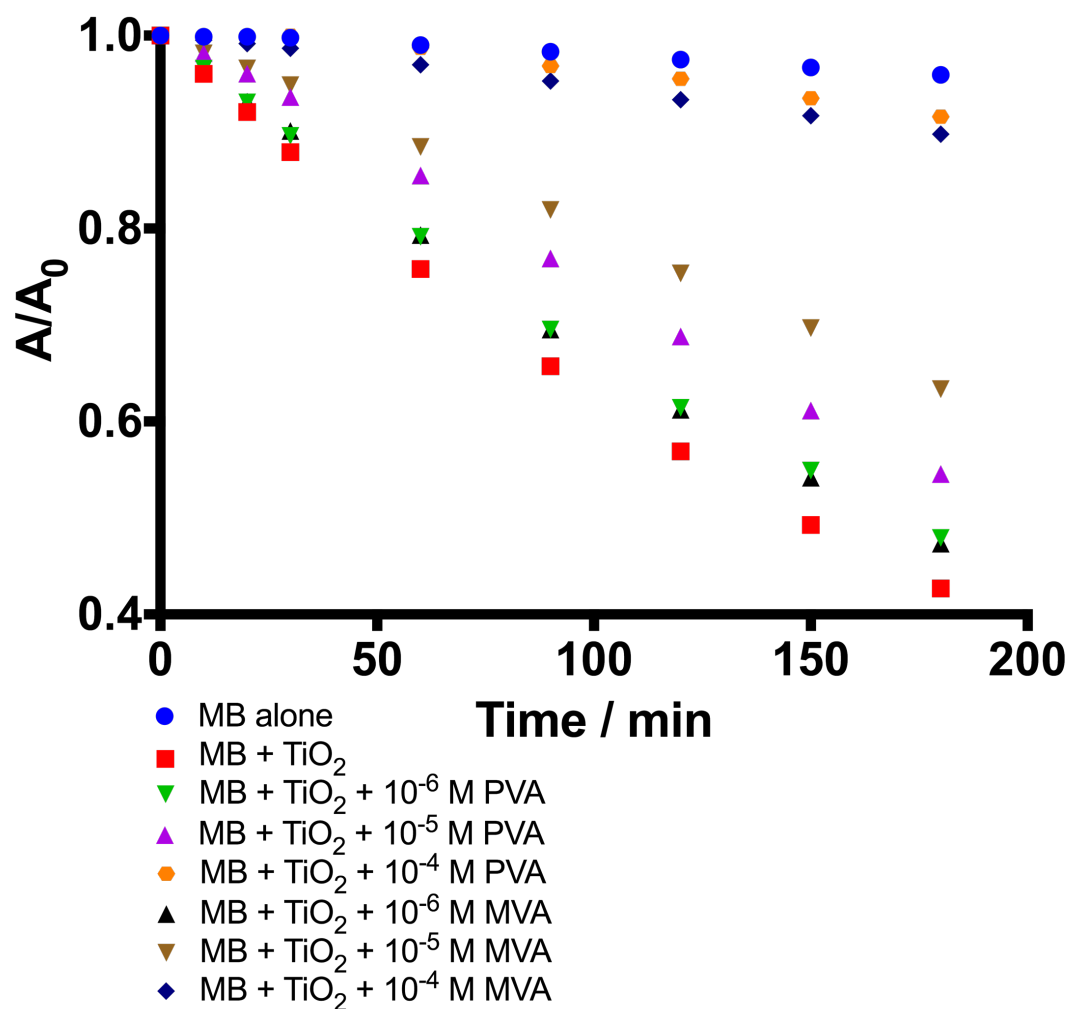

**Figure S14.** Comparison of methylene blue photodegradation kinetics with all species tested.

**Table S2.** Crystal data and structure refinement for **MVA**.

|                                   |                                                                                             |                                 |
|-----------------------------------|---------------------------------------------------------------------------------------------|---------------------------------|
| Identification code               | BZAMVOTF                                                                                    |                                 |
| Empirical formula                 | C <sub>21</sub> H <sub>18</sub> F <sub>6</sub> N <sub>2</sub> O <sub>8</sub> S <sub>2</sub> |                                 |
| Formula weight                    | 604.49                                                                                      |                                 |
| Temperature                       | 173(2) K                                                                                    |                                 |
| Wavelength                        | 1.54178 Å                                                                                   |                                 |
| Crystal system                    | Triclinic                                                                                   |                                 |
| Space group                       | P-1                                                                                         |                                 |
| Unit cell dimensions              | a = 8.67730(10) Å                                                                           | $\alpha = 101.7870(10)^\circ$ . |
|                                   | b = 16.4779(2) Å                                                                            | $\beta = 91.1760(10)^\circ$ .   |
|                                   | c = 26.3132(3) Å                                                                            | $\gamma = 92.2310(10)^\circ$ .  |
| Volume                            | 3678.67(8) Å <sup>3</sup>                                                                   |                                 |
| Z                                 | 6                                                                                           |                                 |
| Density (calculated)              | 1.637 Mg/m <sup>3</sup>                                                                     |                                 |
| Absorption coefficient            | 2.872 mm <sup>-1</sup>                                                                      |                                 |
| F(000)                            | 1848                                                                                        |                                 |
| Crystal size                      | 0.48 x 0.36 x 0.12 mm <sup>3</sup>                                                          |                                 |
| Theta range for data collection   | 2.742 to 68.193°.                                                                           |                                 |
| Index ranges                      | -10<=h<=9, -19<=k<=19, -31<=l<=31                                                           |                                 |
| Reflections collected             | 66119                                                                                       |                                 |
| Independent reflections           | 12961 [R(int) = 0.0513]                                                                     |                                 |
| Completeness to theta = 67.679°   | 96.7 %                                                                                      |                                 |
| Absorption correction             | Semi-empirical from equivalents                                                             |                                 |
| Max. and min. transmission        | 0.7531 and 0.6805                                                                           |                                 |
| Refinement method                 | Full-matrix least-squares on F <sup>2</sup>                                                 |                                 |
| Data / restraints / parameters    | 12961 / 0 / 1069                                                                            |                                 |
| Goodness-of-fit on F <sup>2</sup> | 1.045                                                                                       |                                 |
| Final R indices [I>2sigma(I)]     | R <sub>1</sub> = 0.0400, wR <sub>2</sub> = 0.1087                                           |                                 |
| R indices (all data)              | R <sub>1</sub> = 0.0467, wR <sub>2</sub> = 0.1125                                           |                                 |
| Extinction coefficient            | n/a                                                                                         |                                 |
| Largest diff. peak and hole       | 0.591 and -0.491 e.Å <sup>-3</sup>                                                          |                                 |

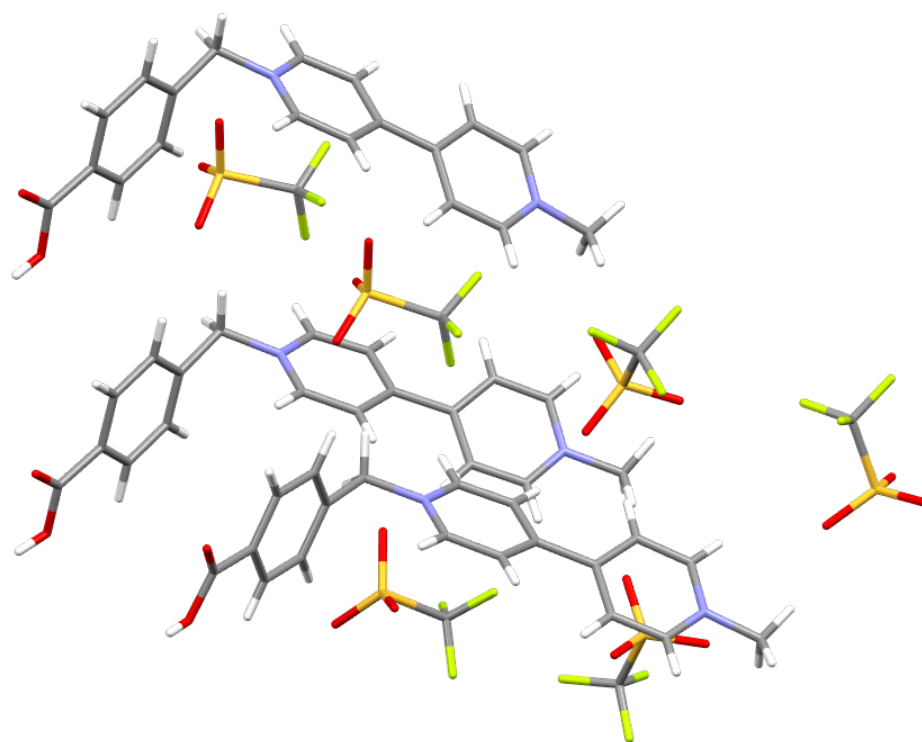

**Figure S15.** Molecular structure and packing of **MVA** in the solid state.

**Table S3.** Frontier Orbital energy levels based on DFT calculations performed at the B3LYP/6-31G(d) level of theory using the PCM solvation model.<sup>[S4]</sup>

|            | LUMO | HOMO | HOMO-1 | Energy Gap |
|------------|------|------|--------|------------|
| <b>MVA</b> | 3.81 | 7.79 | 7.92   | 3.99       |
| <b>PVA</b> | 4.27 | 7.74 | 7.80   | 3.48       |
| <b>MVE</b> | 3.80 | 7.75 | 7.84   | 3.95       |
| <b>PVE</b> | 4.26 | 7.74 | 7.75   | 3.48       |

LUMO

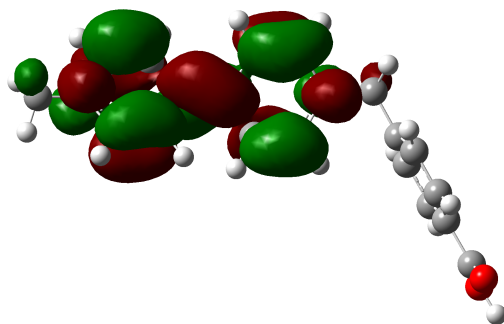

HOMO

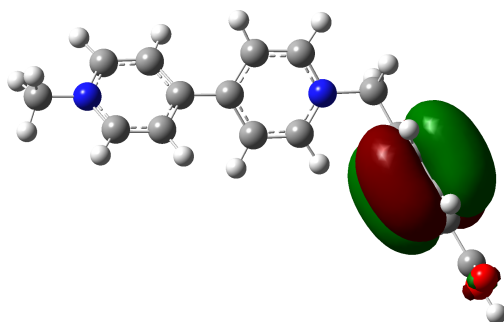

HOMO-1

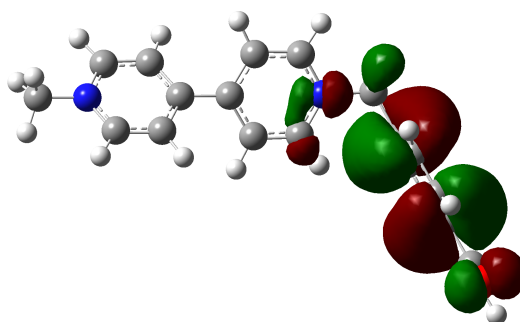

**Figure S16.** DFT calculations for **MVA**.

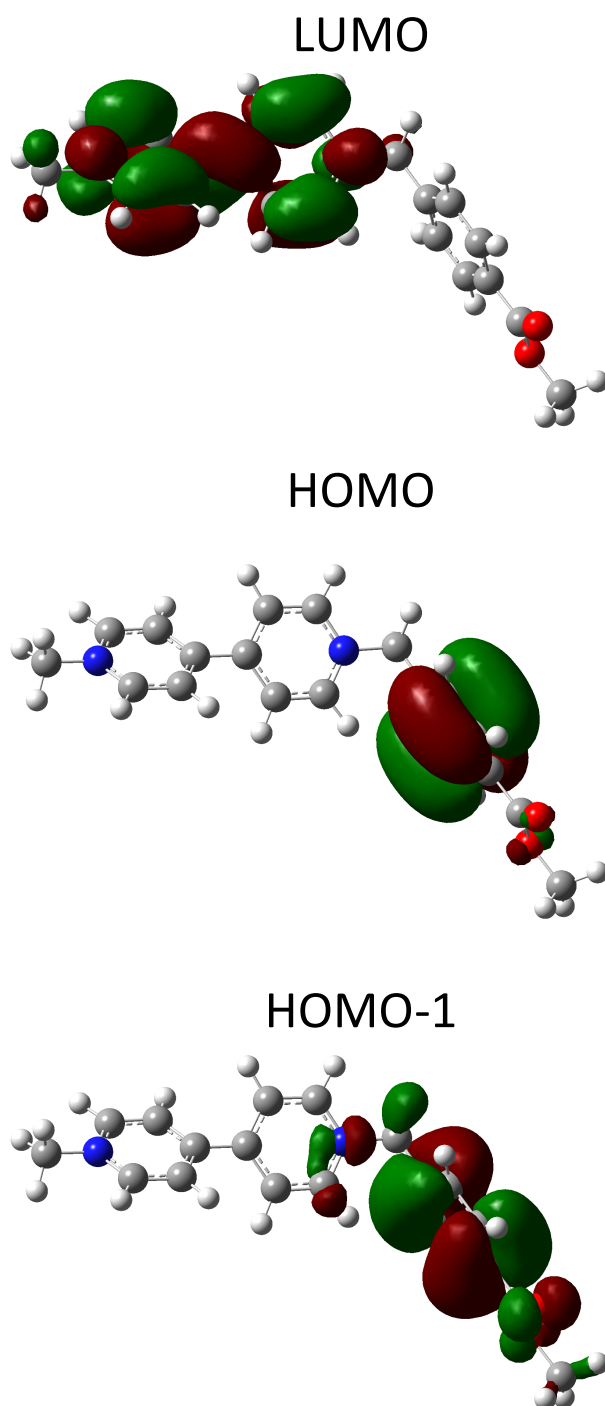

**Figure S17.** DFT calculations for **MVE**.

LUMO

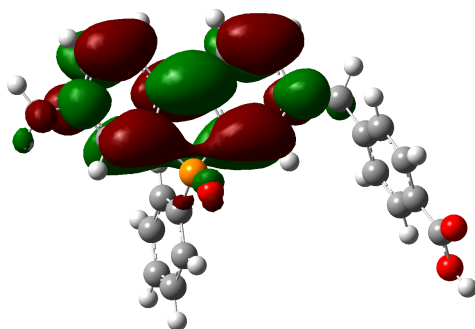

HOMO

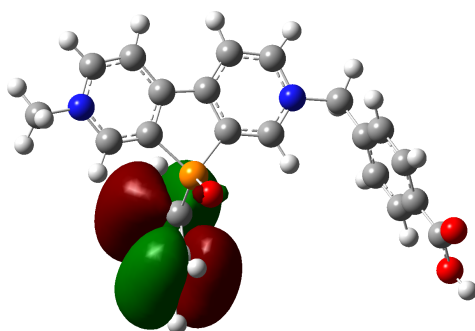

HOMO-1

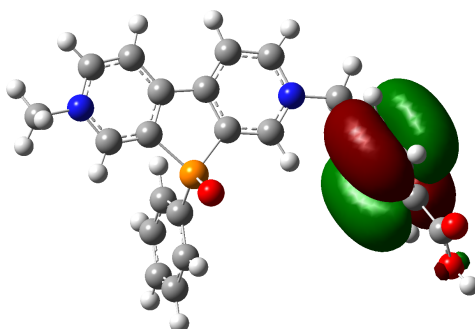

**Figure S18.** DFT calculations for **PVA**.

LUMO

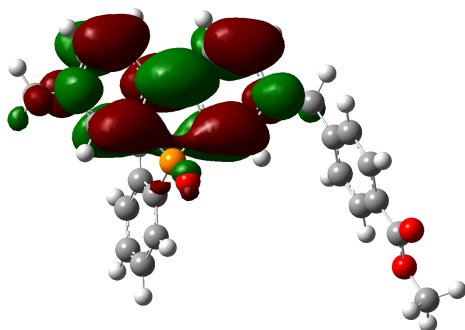

HOMO

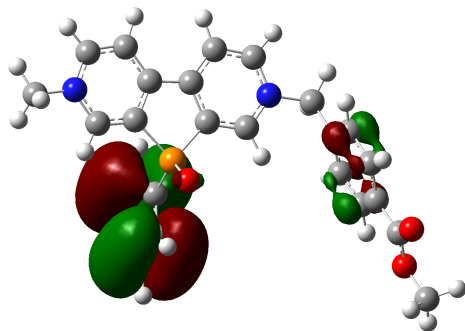

HOMO-1

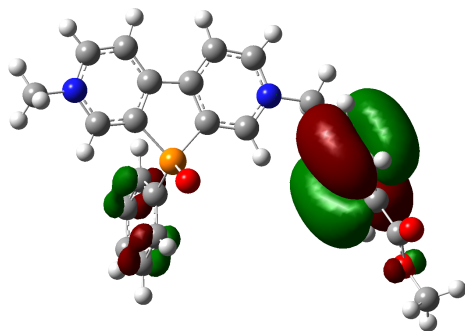

**Figure S19.** DFT calculations for **PVE**.



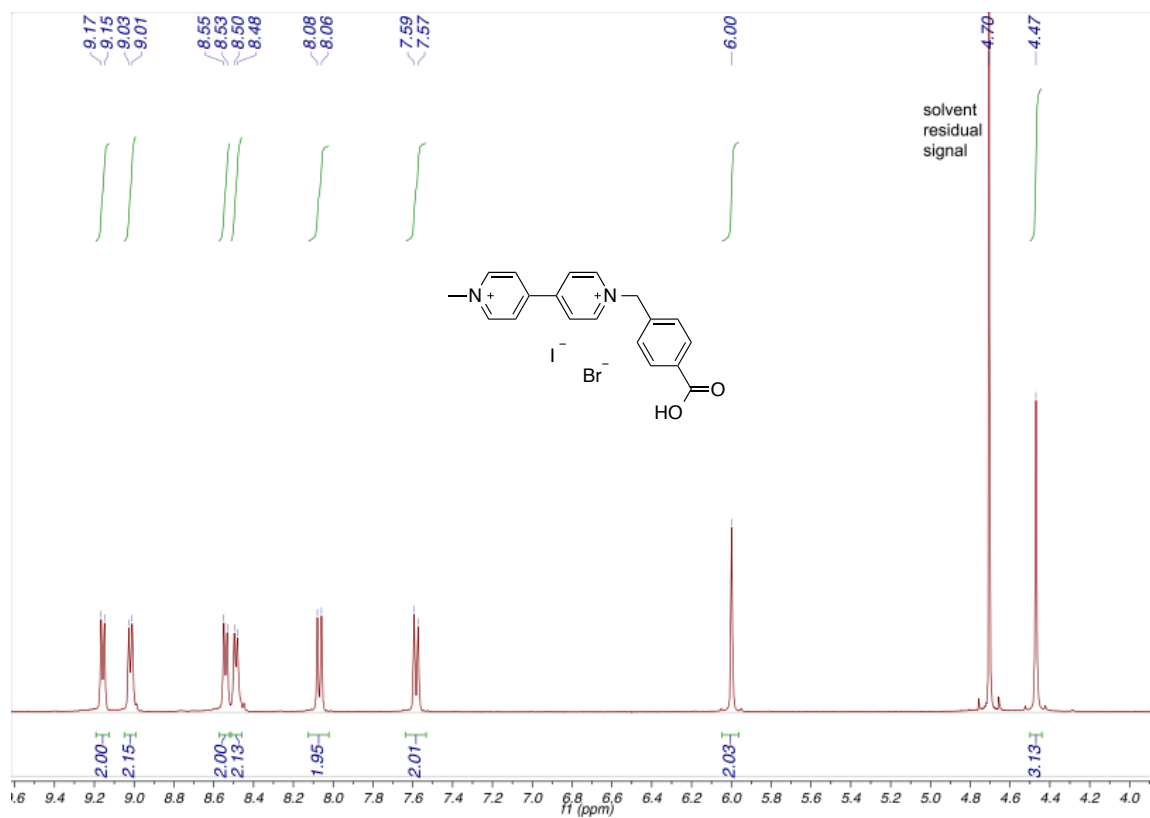

**Figure S20.** <sup>1</sup>H NMR of **2** in D<sub>2</sub>O.

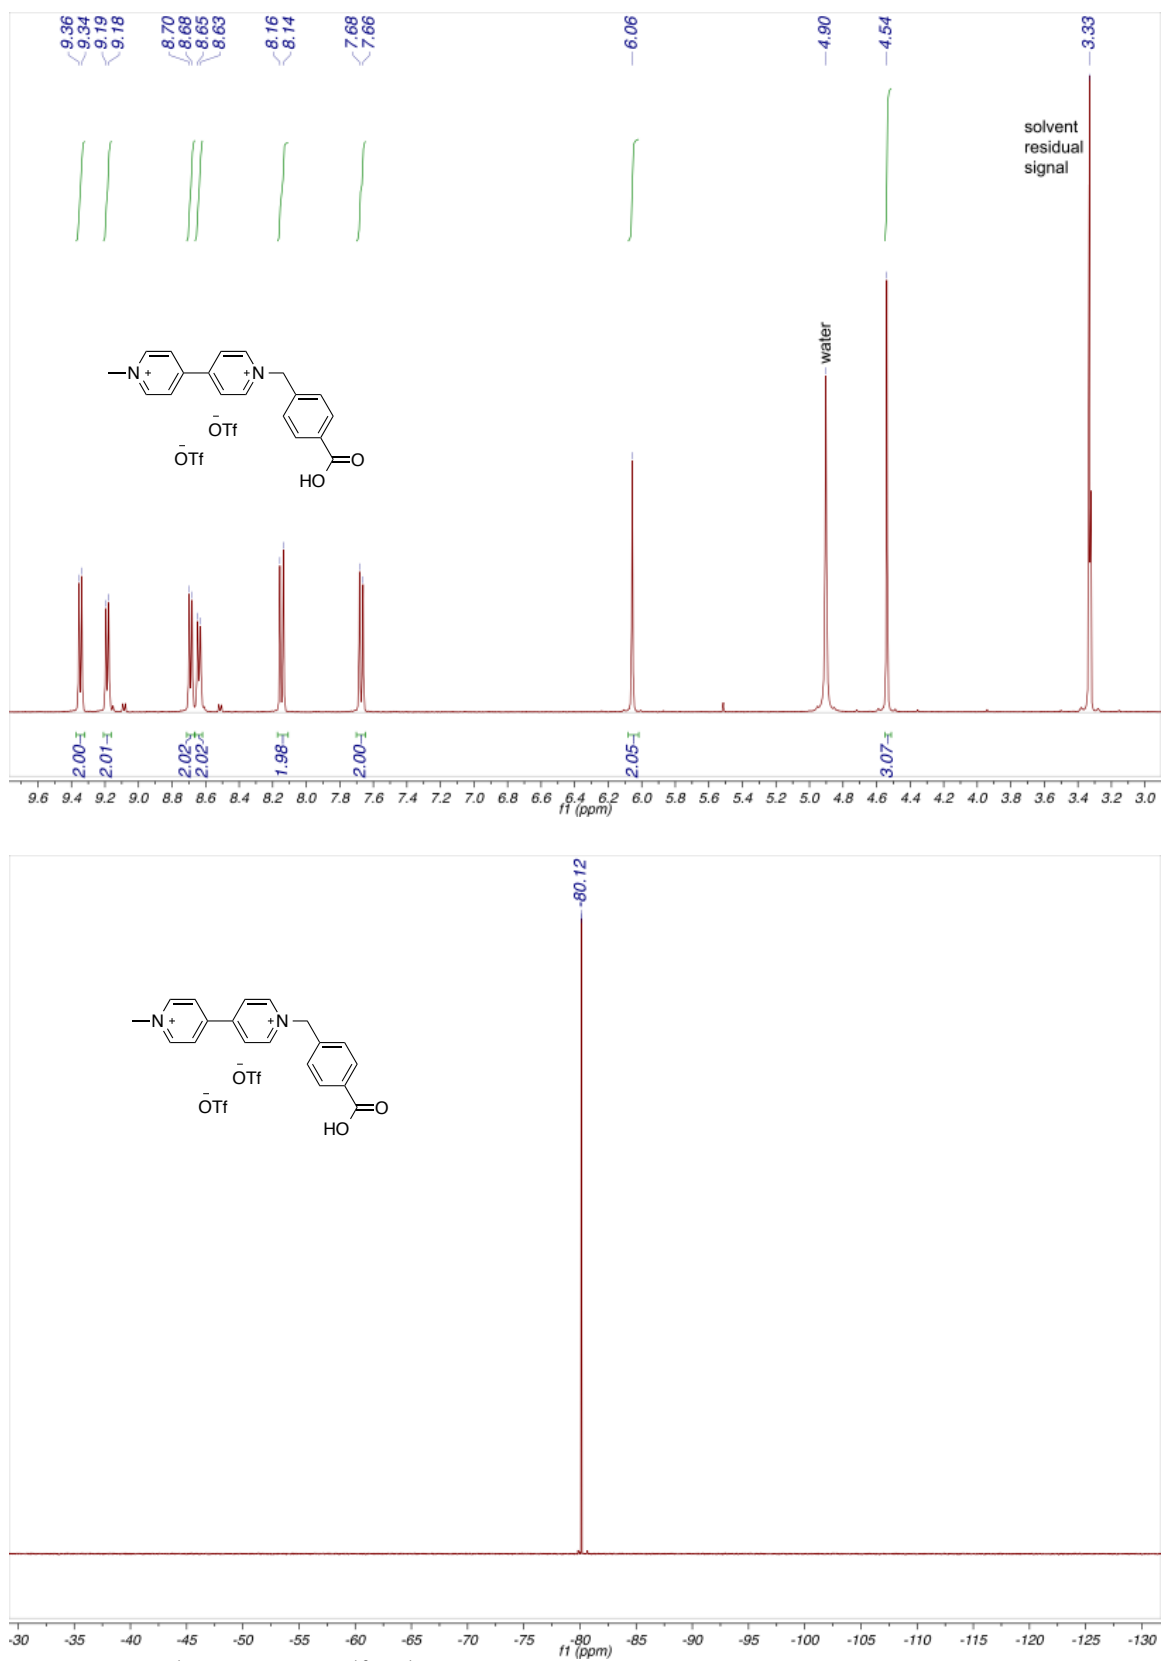

**Figure S21.** <sup>1</sup>H NMR and <sup>19</sup>F{<sup>1</sup>H} NMR of MVA in methanol-d<sub>4</sub>.

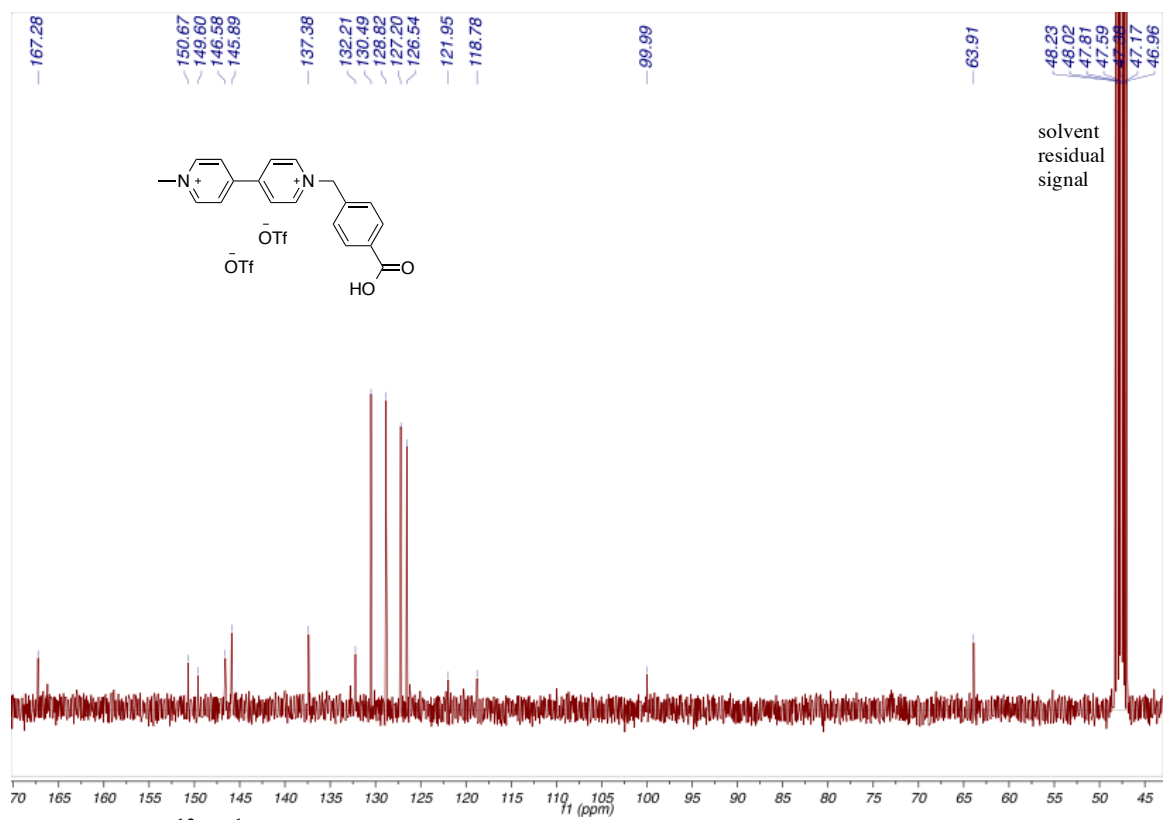

**Figure S22.**  $^{13}\text{C}\{^1\text{H}\}$  NMR of MVA in methanol- $\text{d}_4$ .

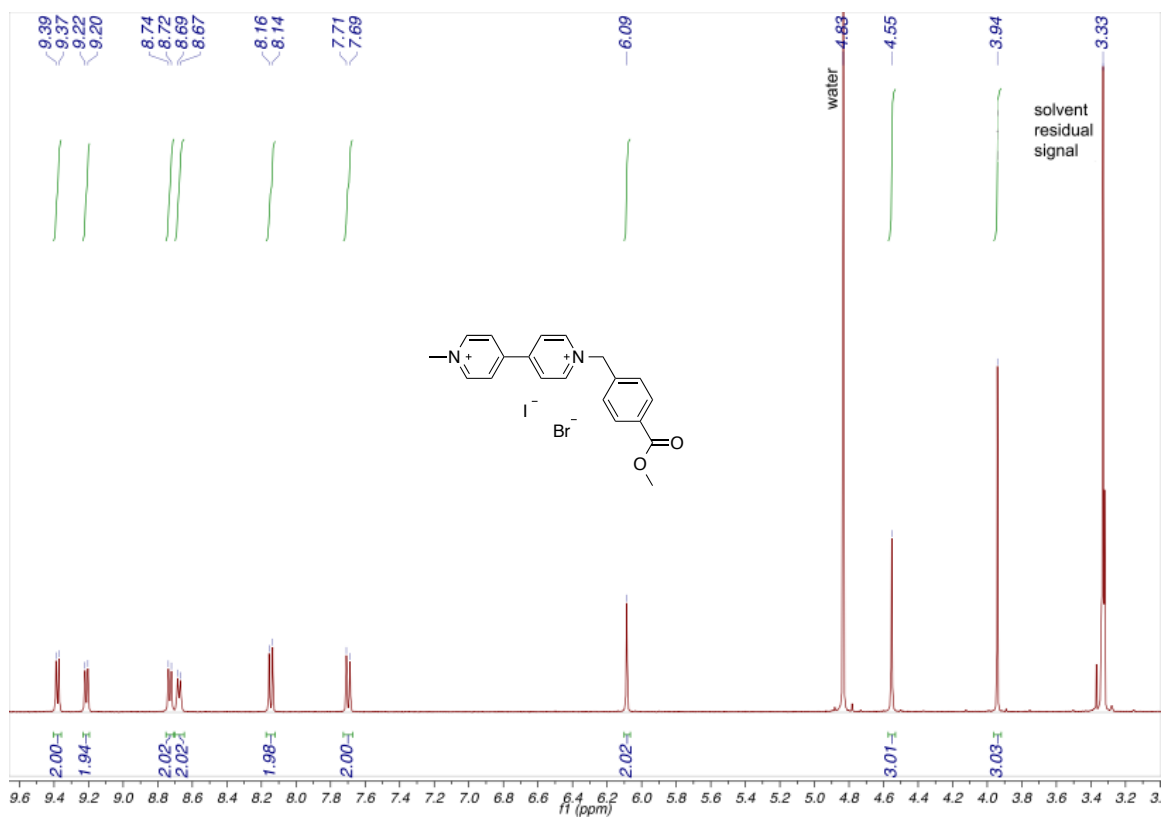

**Figure S23.**  $^1H$  NMR of **3** in methanol- $d_4$ .

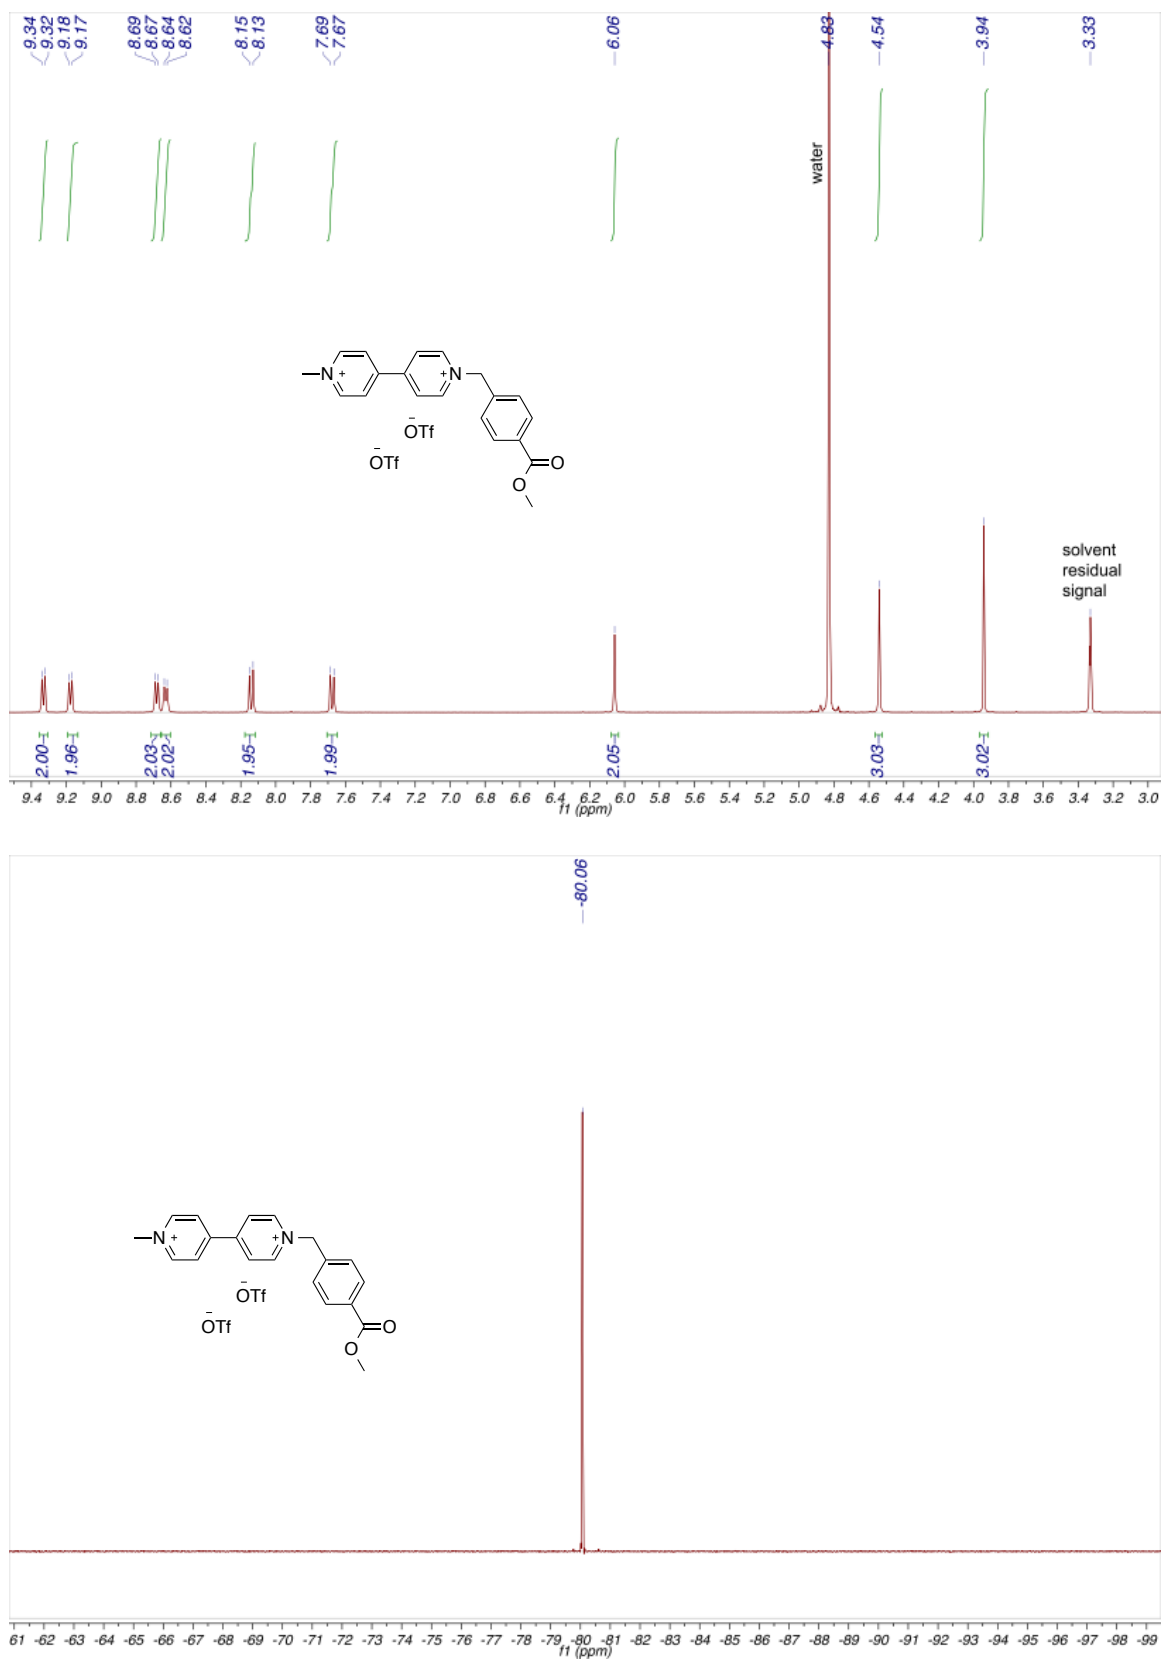

**Figure S24.** <sup>1</sup>H NMR and <sup>19</sup>F{<sup>1</sup>H} NMR of MVE in methanol-d<sub>4</sub>.

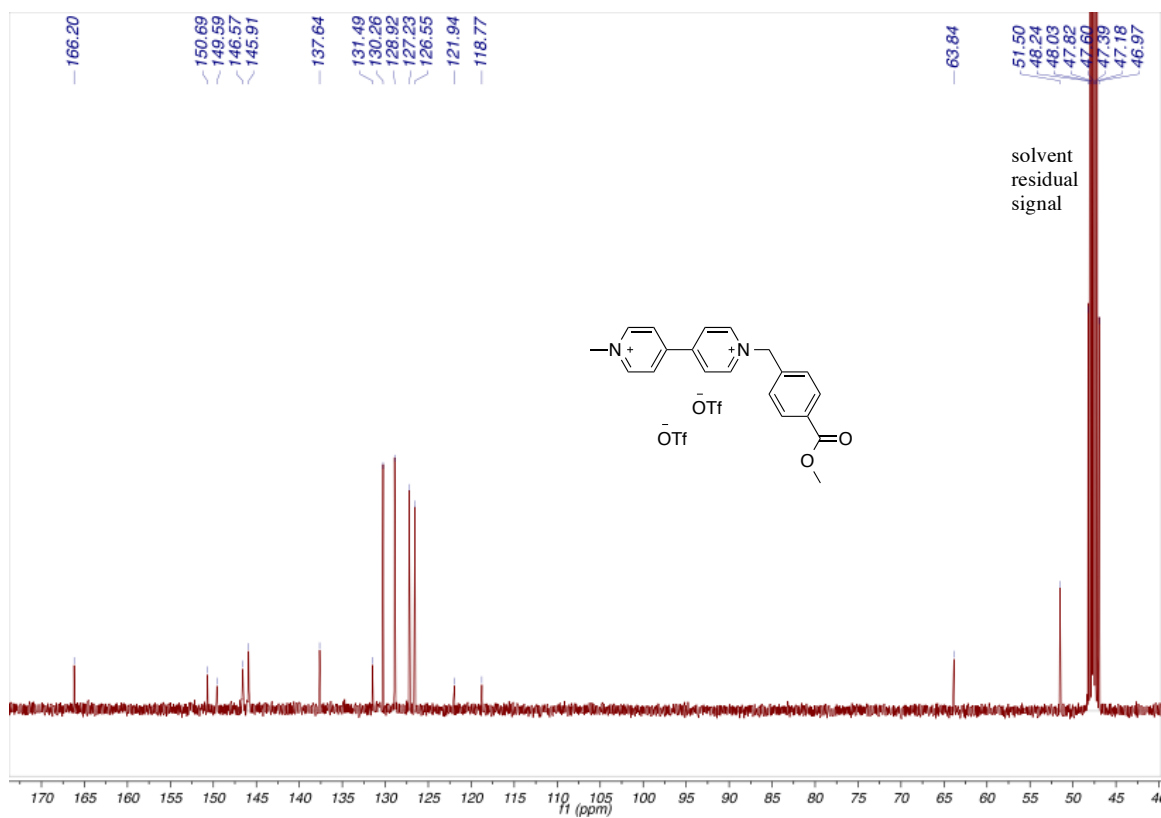

**Figure S25.**  $^{13}\text{C}\{^1\text{H}\}$  NMR of MVE in methanol- $\text{d}_4$ .

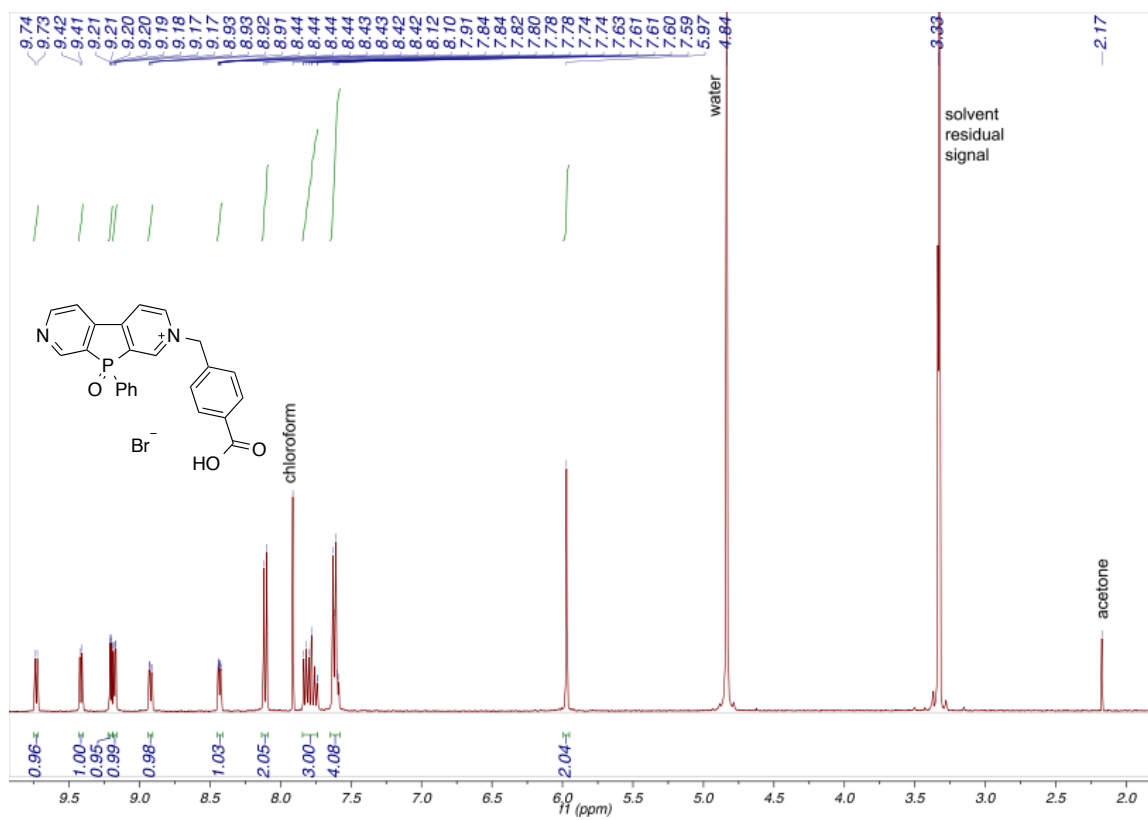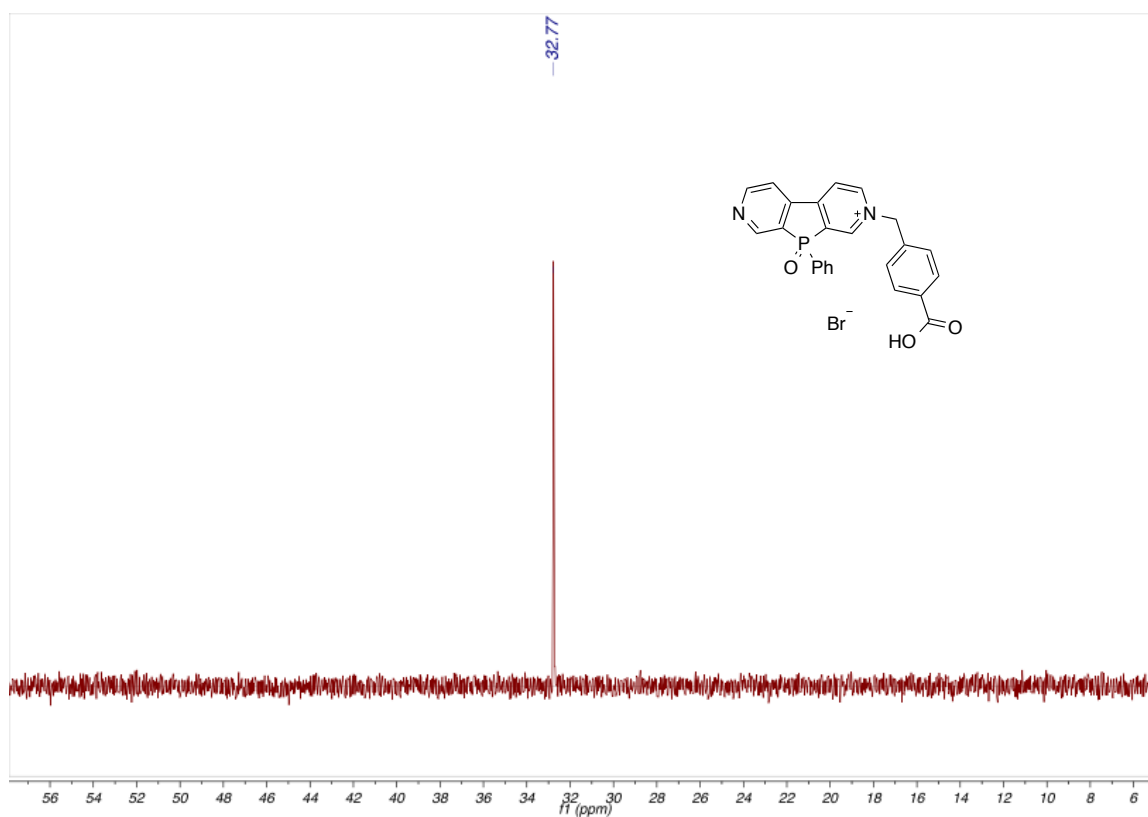

**Figure S26.** <sup>1</sup>H NMR and <sup>31</sup>P{<sup>1</sup>H} NMR of **5** in methanol-d<sub>4</sub>.

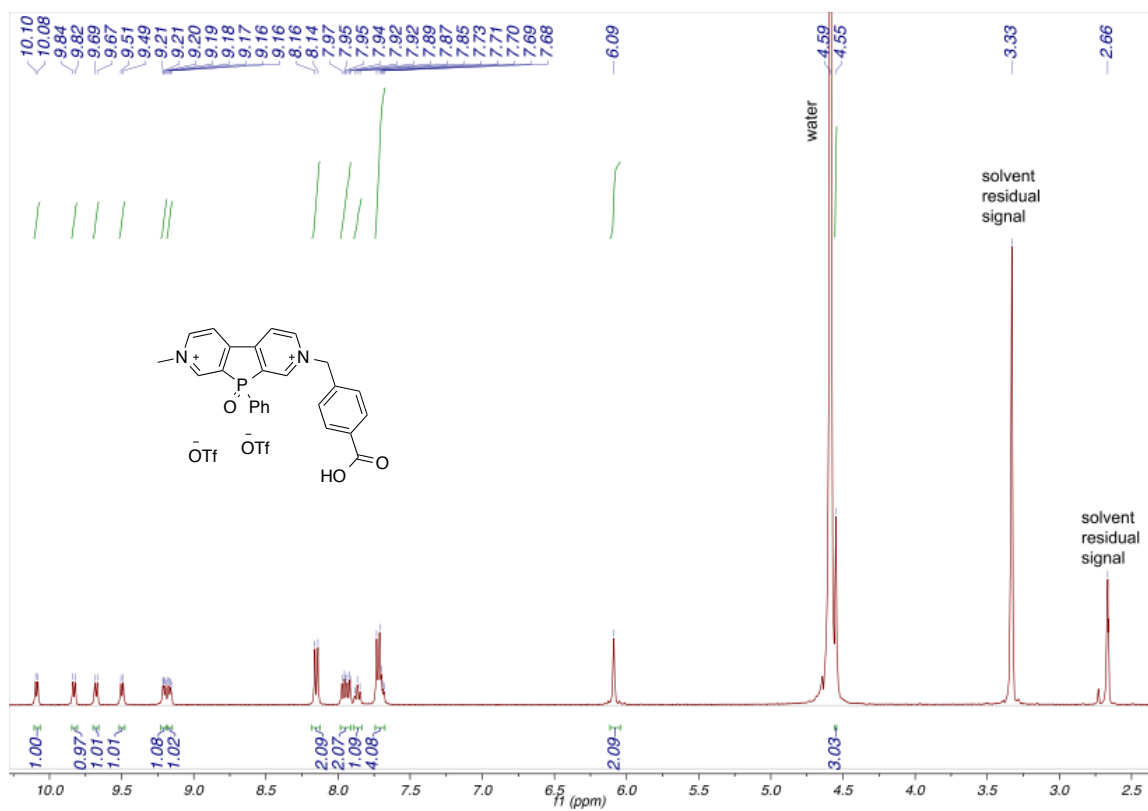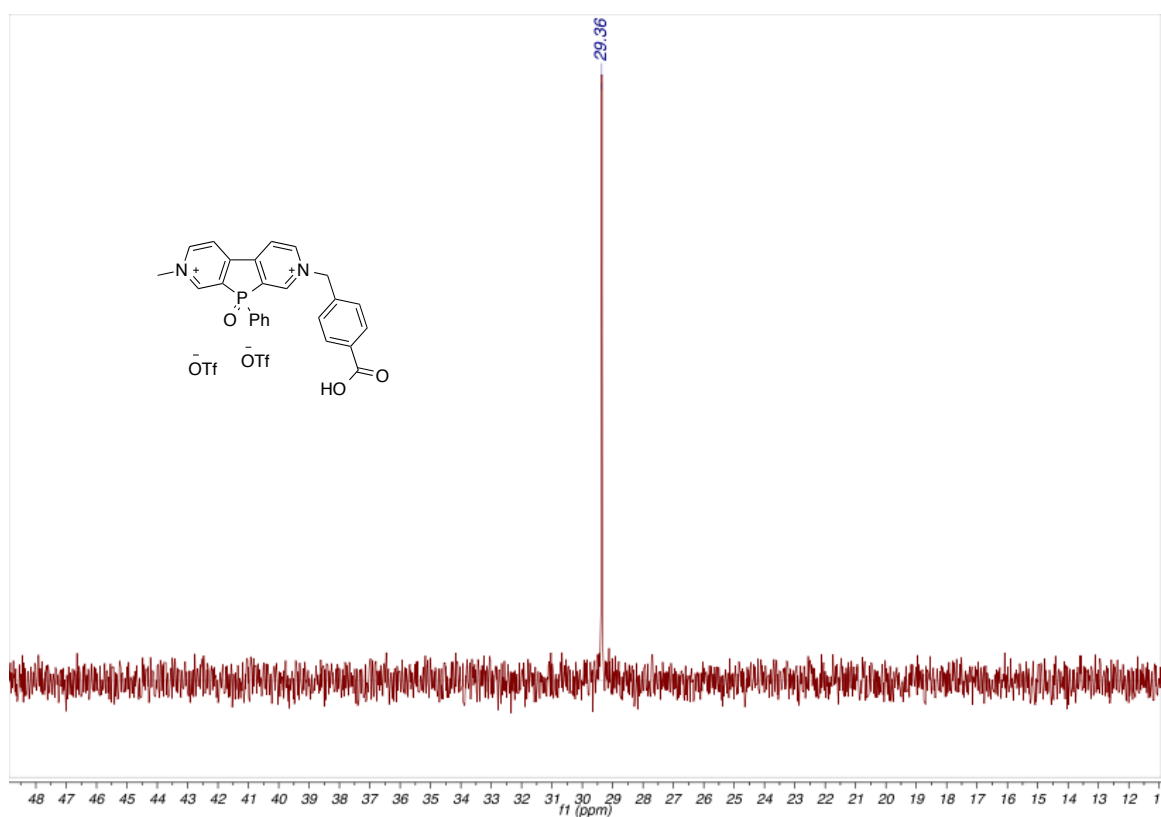

**Figure S27.** <sup>1</sup>H NMR and <sup>31</sup>P{<sup>1</sup>H} NMR of PVA in methanol-d<sub>4</sub> (with DMSO-d<sub>6</sub>).



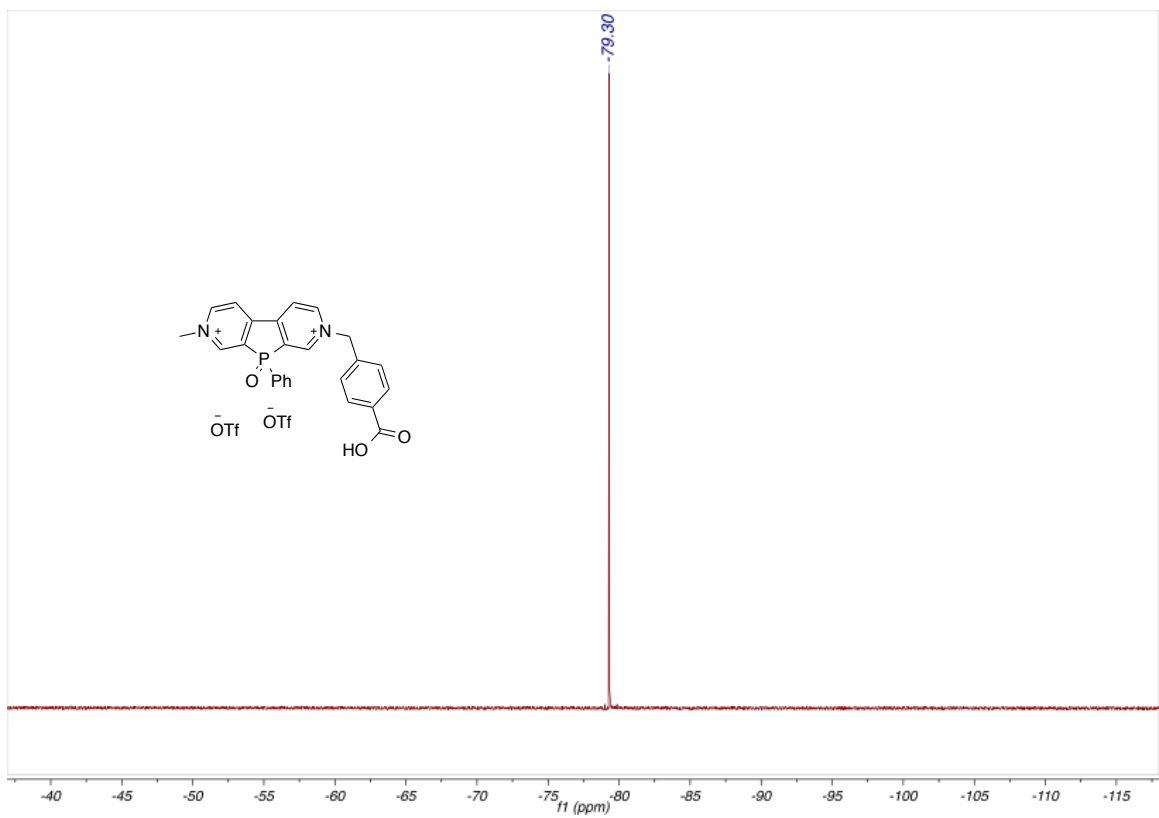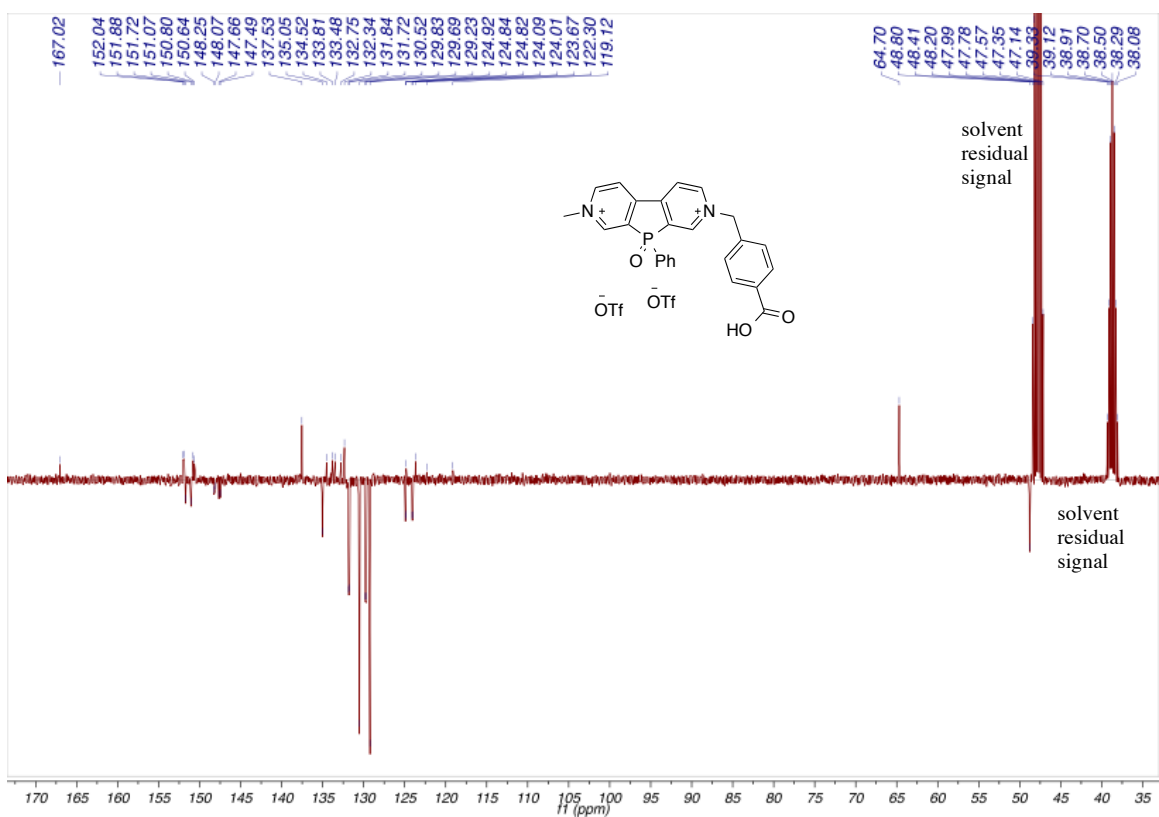

**Figure S28.**  $^{19}\text{F}\{^1\text{H}\}$  NMR and  $^{13}\text{C}\{^1\text{H}\}$  NMR of PVA in methanol- $\text{d}_4$  (with DMSO- $\text{d}_6$ ).

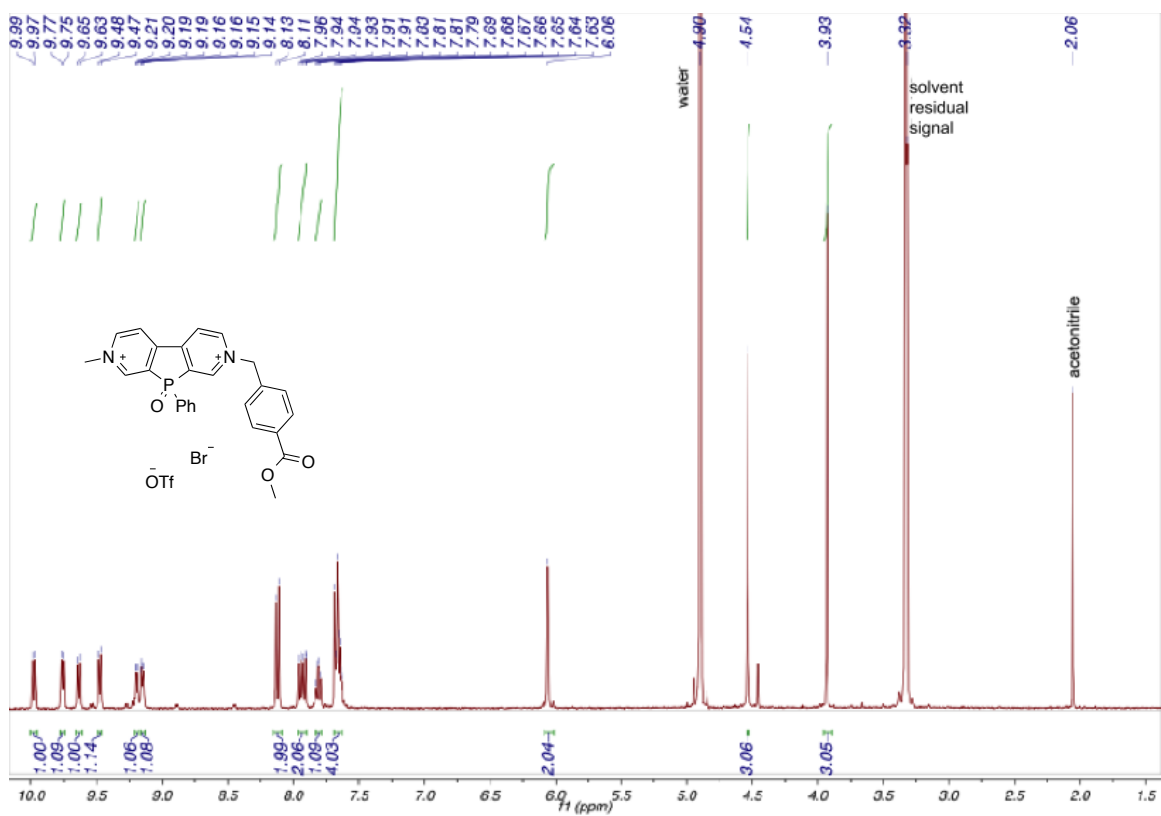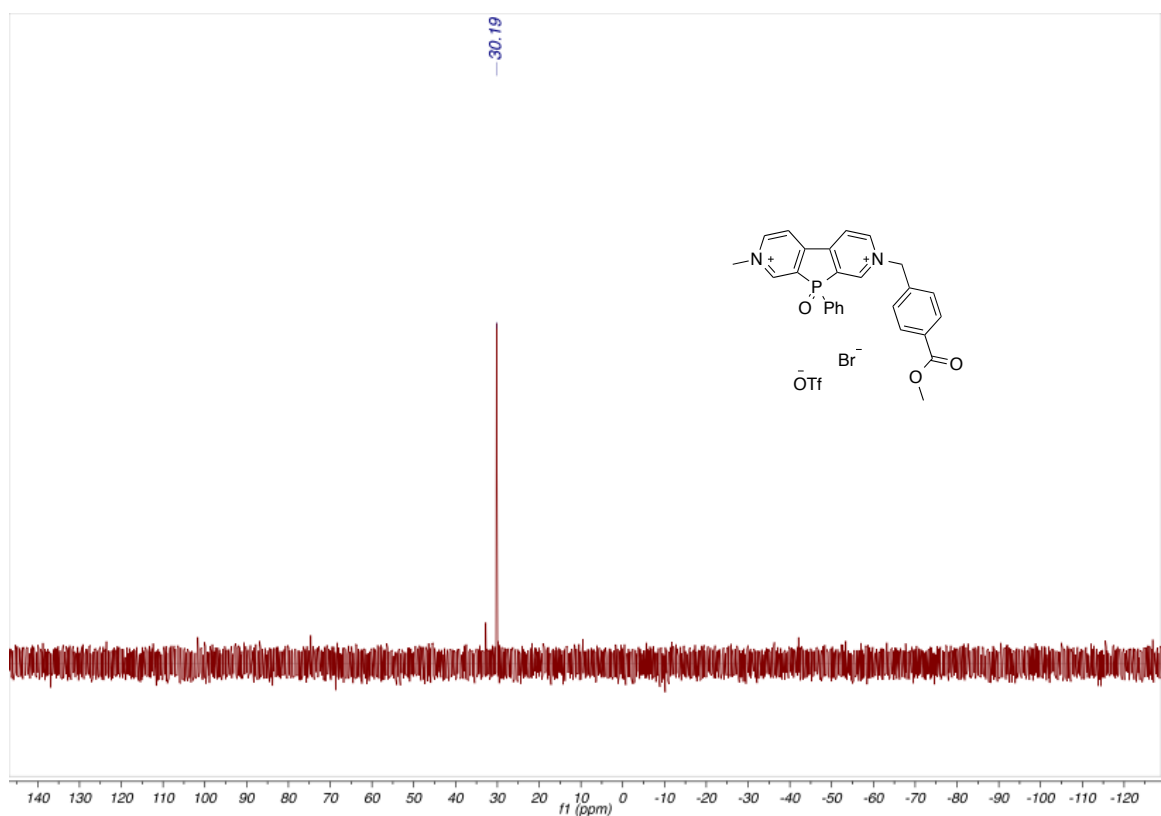

**Figure S29.** <sup>1</sup>H NMR and <sup>31</sup>P{<sup>1</sup>H} NMR of **7** in methanol-d<sub>4</sub>.

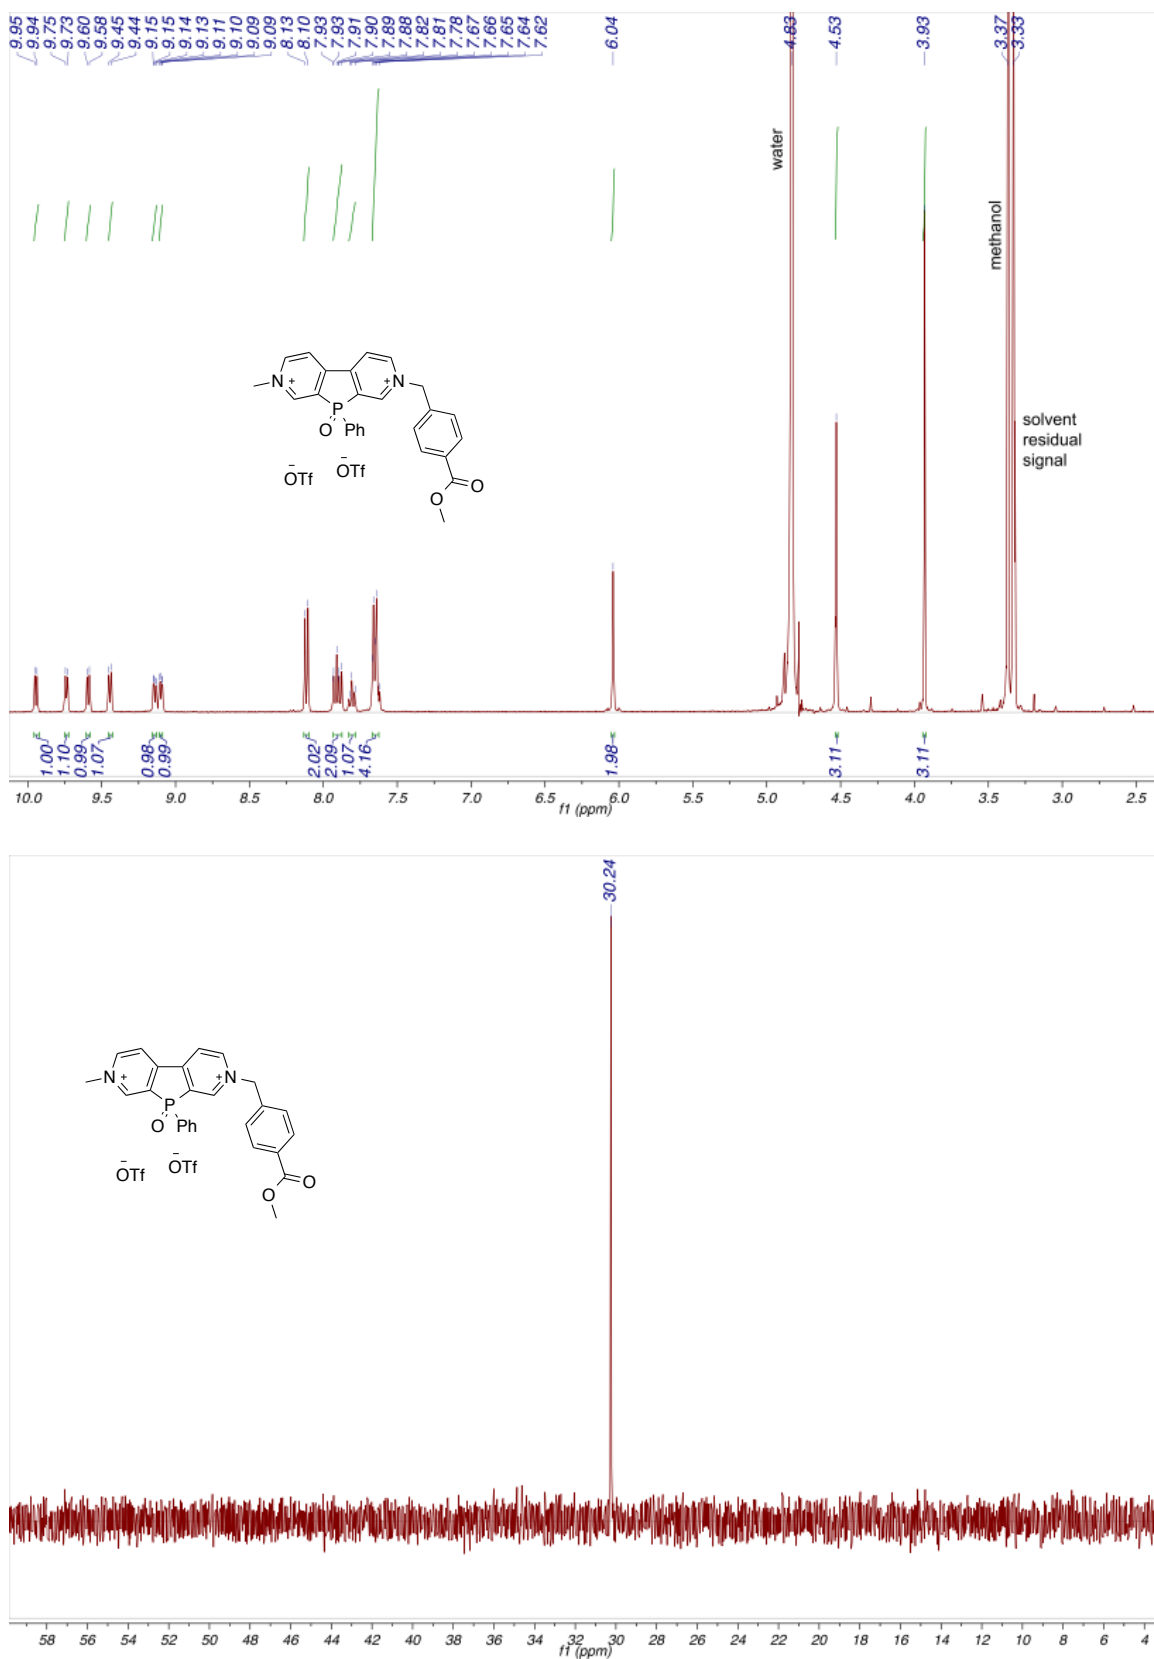

**Figure S30.**  $^1\text{H}$  NMR and  $^{31}\text{P}\{^1\text{H}\}$  NMR of **PVE** in methanol- $\text{d}_4$ .

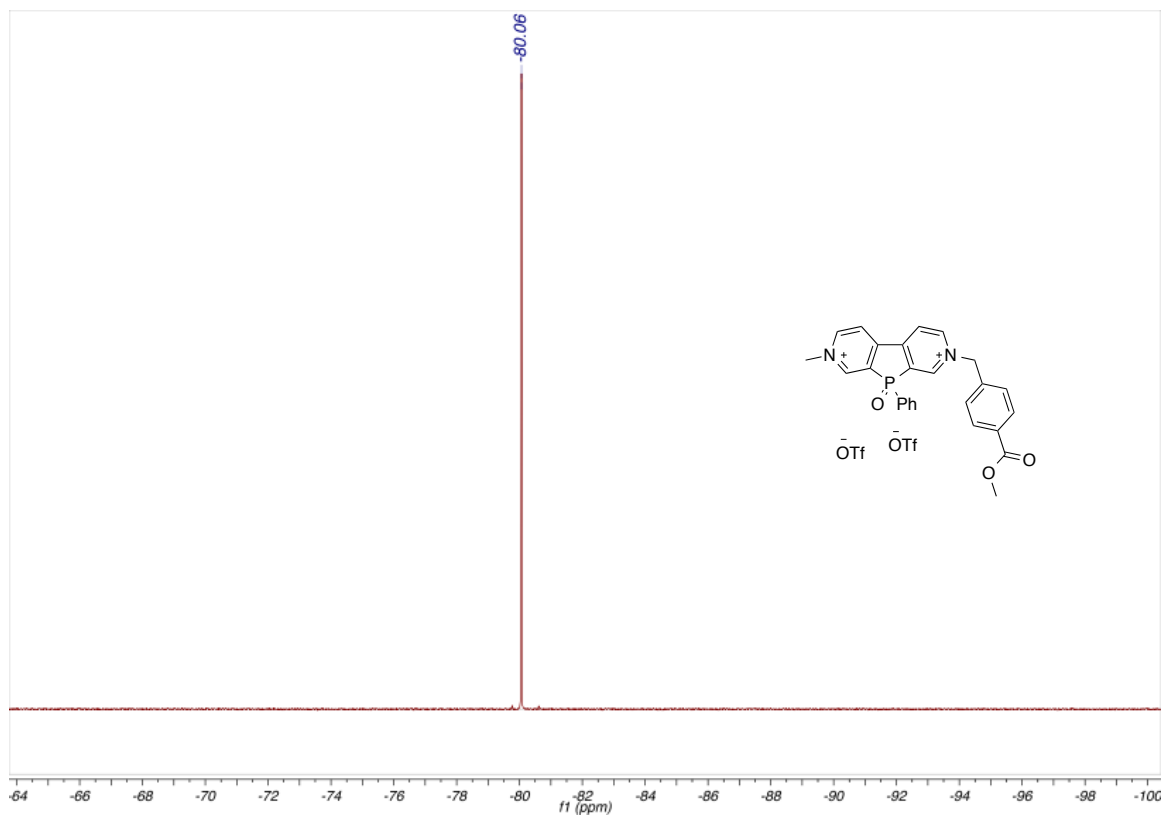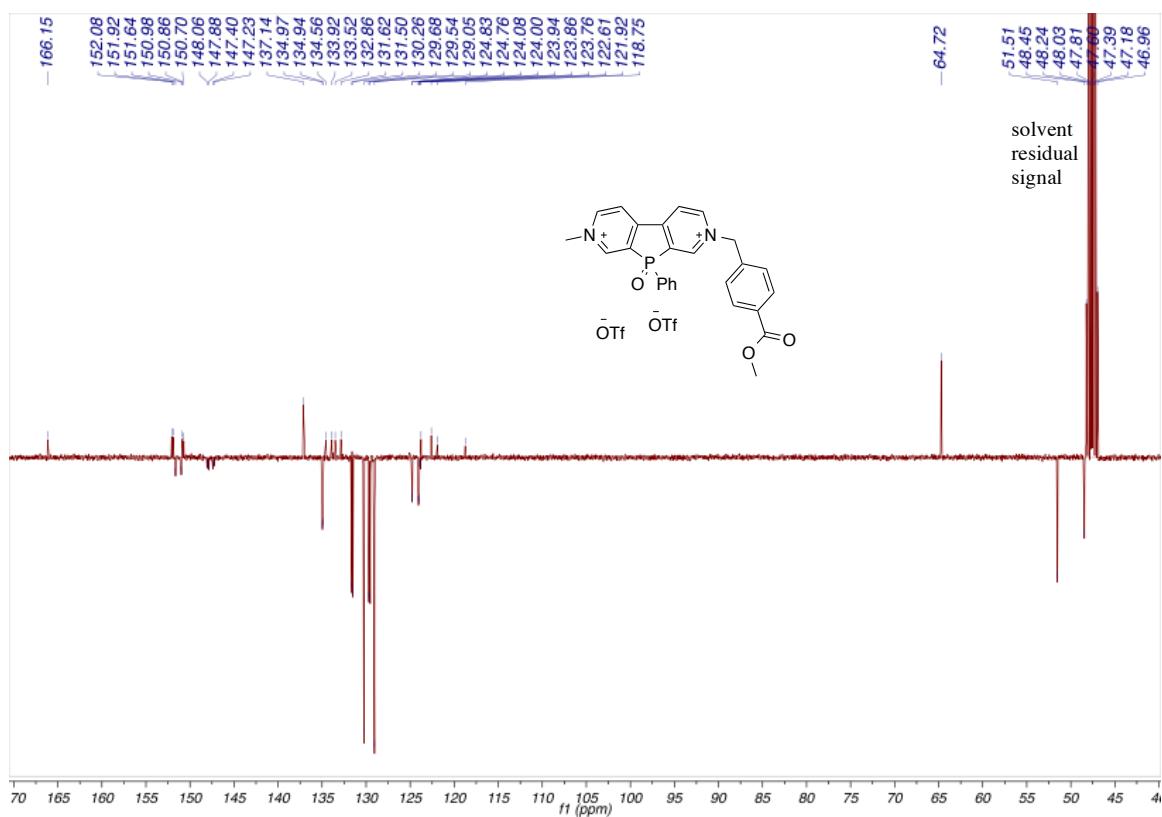

**Figure S31.**  $^{19}\text{F}\{^1\text{H}\}$  NMR and  $^{13}\text{C}\{^1\text{H}\}$  NMR of PVE in methanol-d<sub>4</sub>.

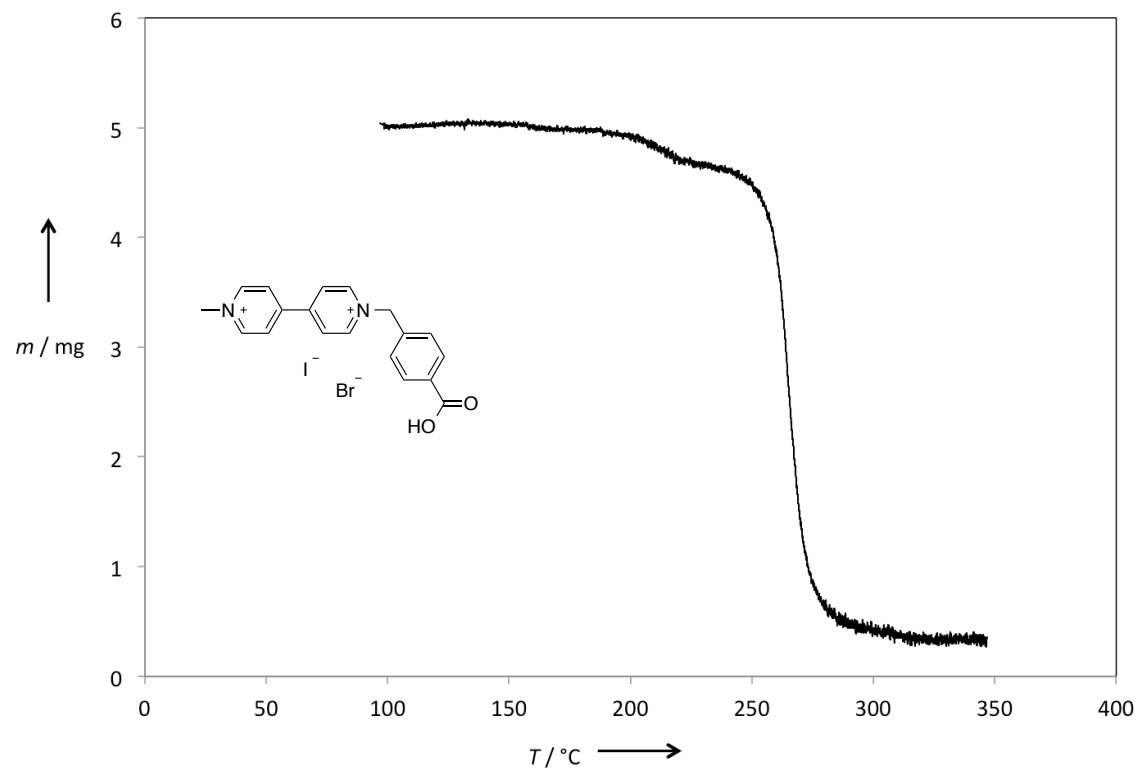

**Figure S32.** TGA of **2**.

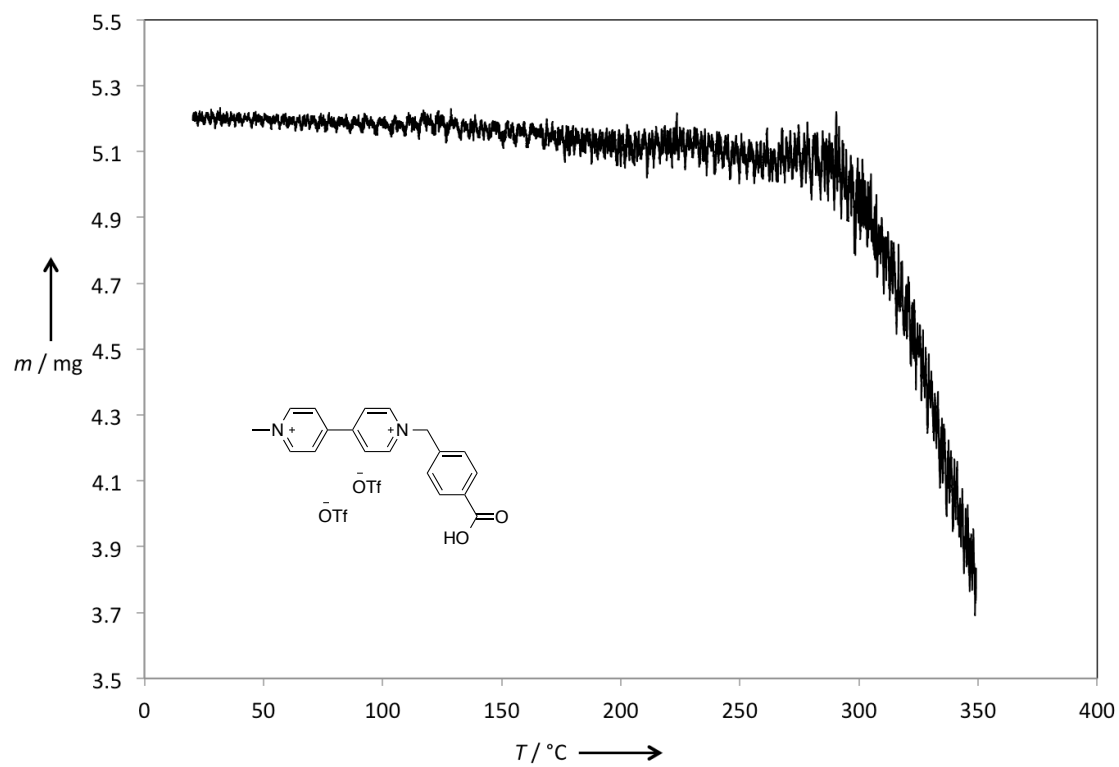

**Figure S33.** TGA of MVA.

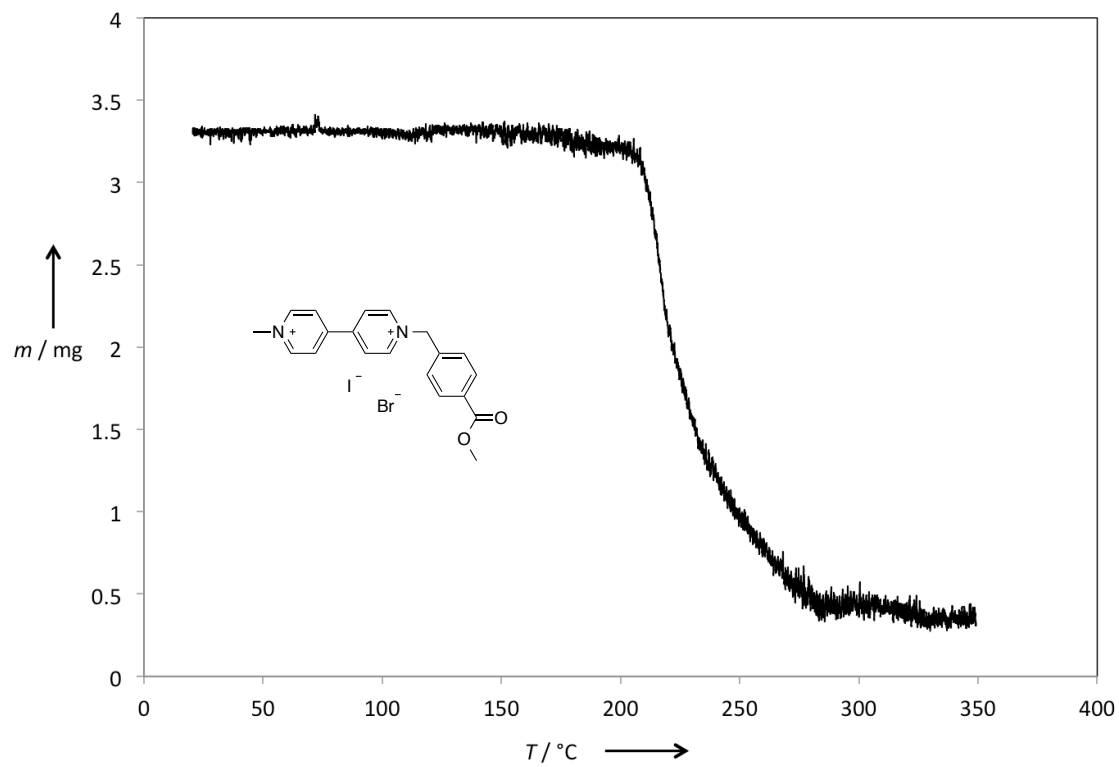

**Figure S34.** TGA of **3**.

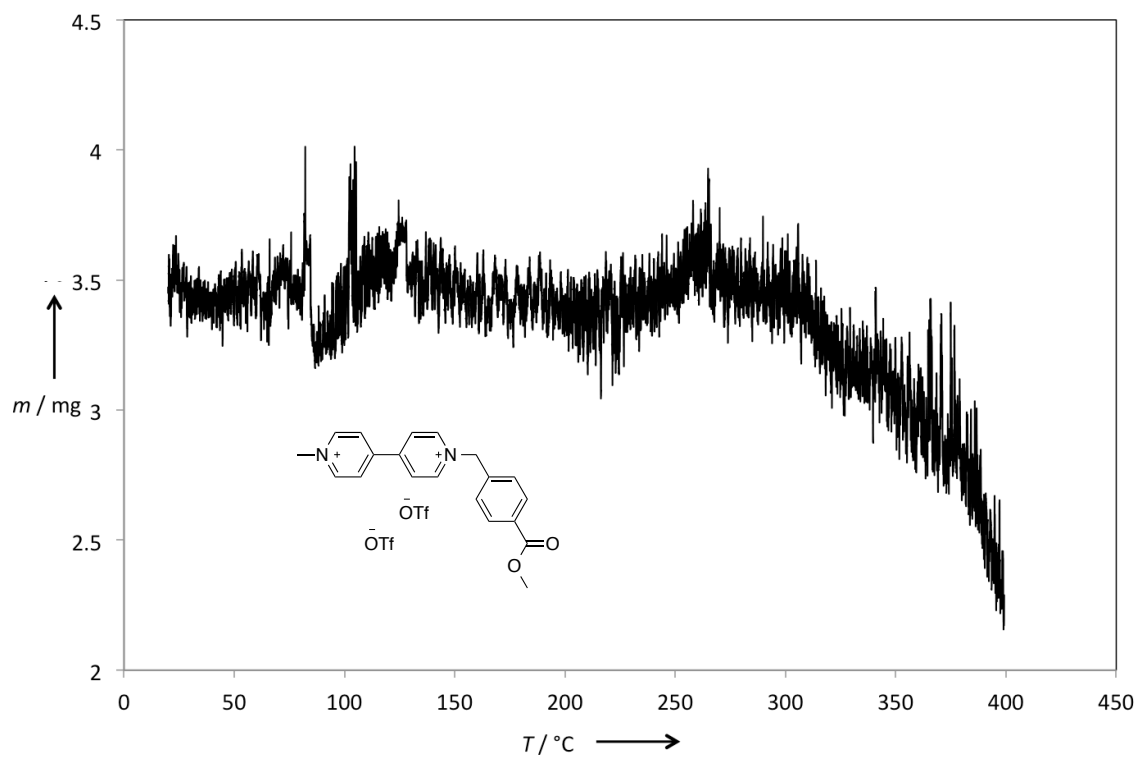

**Figure S35.** TGA of MVE.



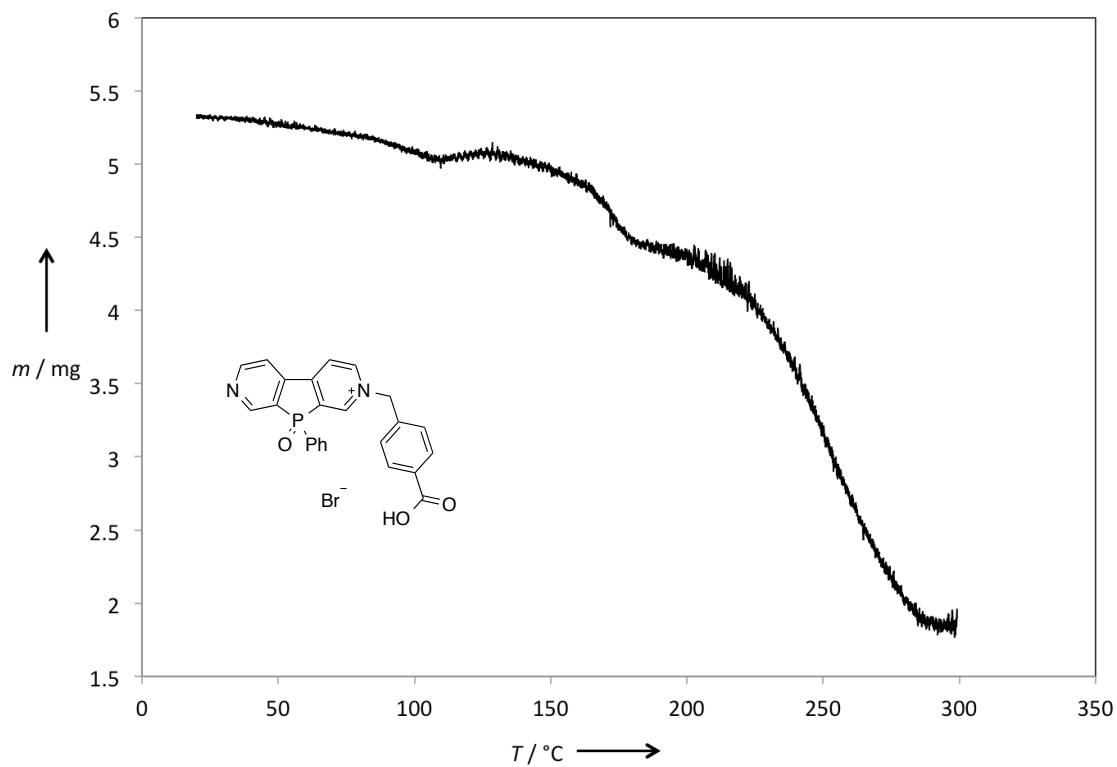

**Figure S36.** TGA of **5**.



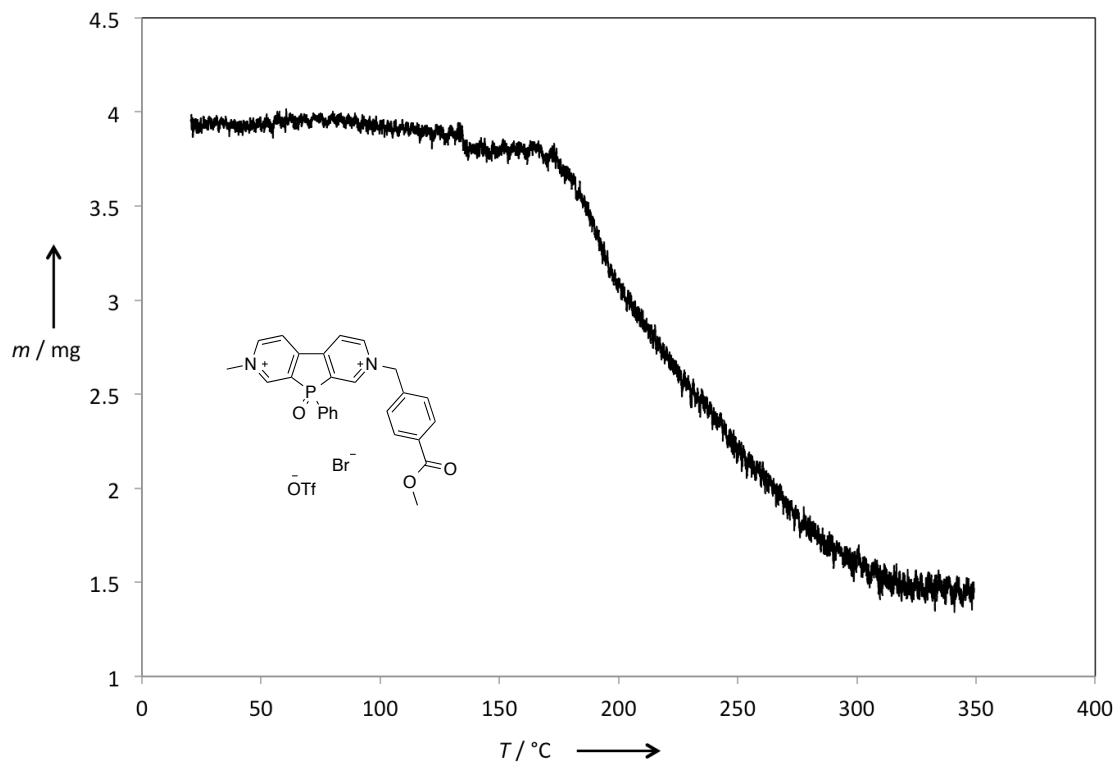

**Figure S38.** TGA of 7.

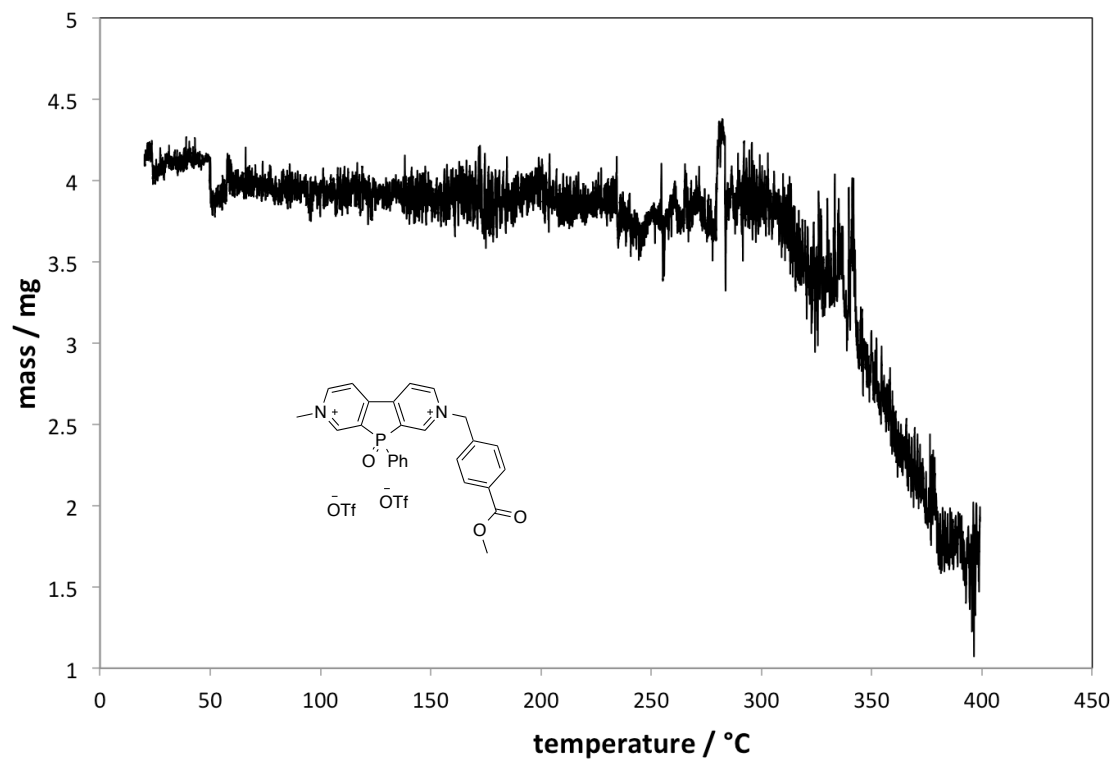

**Figure S39.** TGA of PVE.

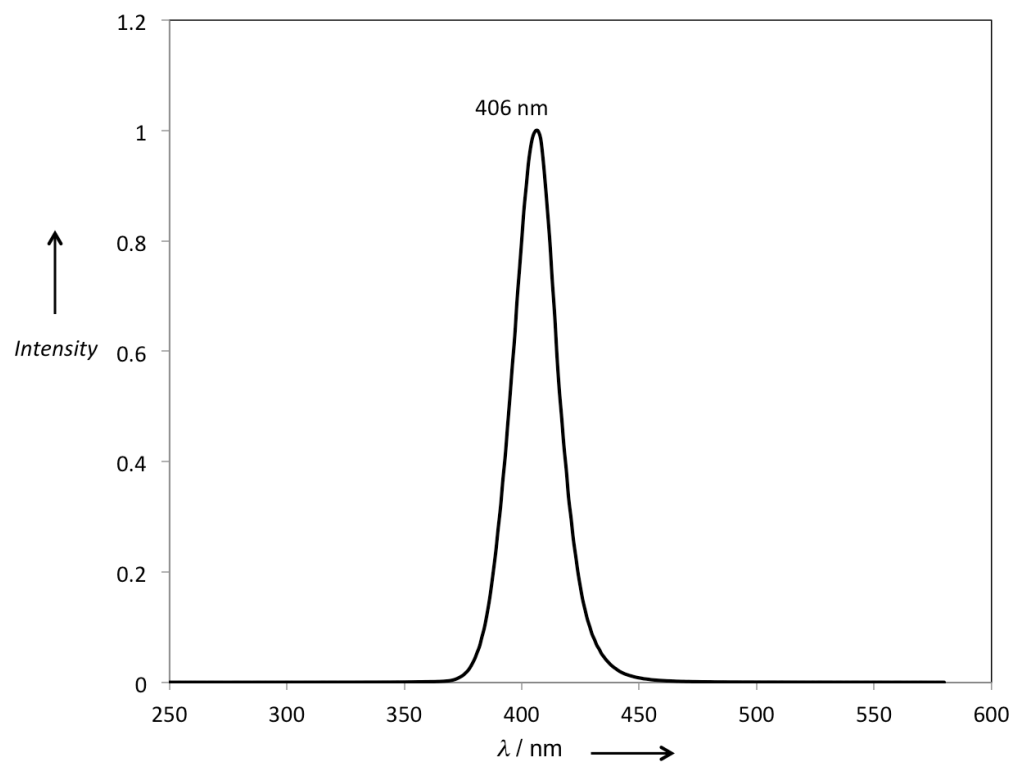

**Figure S40.** Spectral profile of 2W LED purchased from Lumex.

## References

- [S1] E. L. Robb, J. M. Gawel, D. Aksentijević, H. M. Cochemé, T. S. Stewart, M. M. Shchepinova, H. Qiang, T. A. Prime, T. P. Bright, A. M. James, M. J. Shattock, H. M. Senn, R. C. Hartley, M. P. Murphy, *Free Radical Biology and Medicine*, **2015**, *89*, 883–894.
- [S2] S. Durben, T. Baumgartner, *Angew. Chem.* **2011**, *123*, 8096-8100; *Angew. Chem. Int. Ed.* **2011**, *50*, 7948-7952.
- [S3] M. Stolar, C. Reus, T. Baumgartner, *Adv. Energy Mater.* **2016**, *6*, 1600944.
- [S4] M. J. Frisch, G. W. Trucks, H. B. Schlegel, G. E. Scuseria, M. A. Robb, J. R. Cheeseman, J. A. Montgomery, Jr., T. Vreven, K. N. Kudin, J. C. Burant, J. M. Millam, S. S. Iyengar, J. Tomasi, V. Barone, B. Mennucci, M. Cossi, G. Scalmani, N. Rega, G. A. Petersson, H. Nakatsuji, M. Hada, M. Ehara, K. Toyota, R. Fukuda, J. Hasegawa, M. Ishida, T. Nakajima, Y. Honda, O. Kitao, H. Nakai, M. Klene, X. Li, J. E. Knox, H. P. Hratchian, J. B. Cross, V. Bakken, C. Adamo, J. Jaramillo, R. Gomperts, R. E. Stratmann, O. Yazyev, A. J. Austin, R. Cammi, C. Pomelli, J. W. Ochterski, P. Y. Ayala, K. Morokuma, G. A. Voth, P. Salvador, J. J. Dannenberg, V. G. Zakrzewski, S. Dapprich, A. D. Daniels, M. C. Strain, O. Farkas, D. K. Malick, A. D. Rabuck, K. Raghavachari, J. B. Foresman, J. V. Ortiz, Q. Cui, A. G. Baboul, S. Clifford, J. Cioslowski, B. B. Stefanov, G. Liu, A. Liashenko, P. Piskorz, I. Komaromi, R. L. Martin, D. J. Fox, T. Keith, M. A. Al-Laham, C. Y. Peng, A. Nanayakkara, M. Challacombe, P. M. W. Gill, B. Johnson, W. Chen, M.W. Wong, C. Gonzalez, J. A. Pople, Gaussian Inc., Wallingford, CT, 2007.
